# Supplementary material for: EIF4G1 Is a Potential Prognostic Biomarker of Breast Cancer
Source: MDPI journal article supplement (doi:10.3390/biom12121756), 2022-11-26
Supplement: s1 [file s1]

**Table S3.** Clinical data of BRCA specimens in tissue microarray.

| Variable           | Cases n (%) | EIF4G1 Expression |      | <i>p</i> -Value |
|--------------------|-------------|-------------------|------|-----------------|
|                    |             | Low               | High |                 |
| <b>Total</b>       | 80 (100%)   | 74                | 6    |                 |
| <b>Age</b>         |             |                   |      |                 |
| ≤ 58               | 60 (75.00)  | 56                | 4    | 0.96            |
| > 58               | 20 (25.00)  | 18                | 2    |                 |
| <b>TNM stage</b>   |             |                   |      |                 |
| I/II               | 59 (73.75)  | 55                | 4    | 0.18            |
| III/IV             | 21 (26.25)  | 19                | 2    |                 |
| <b>T stage</b>     |             |                   |      |                 |
| T1/T2              | 76 (95.00)  | 70                | 6    | 0.87            |
| T3/T4              | 4 (5.00)    | 4                 | 0    |                 |
| <b>N stage</b>     |             |                   |      |                 |
| N0/N1              | 60 (75.00)  | 56                | 4    | 0.13            |
| N2/N3              | 20 (25.00)  | 18                | 2    |                 |
| <b>Grade</b>       |             |                   |      |                 |
| I/II               | 10 (12.50)  | 9                 | 1    | 0.59            |
| III                | 70 (87.5)   | 65                | 5    |                 |
| <b>PR status</b>   |             |                   |      |                 |
| Negative           | 41 (51.25)  | 36                | 5    | 0.79            |
| Positive           | 39 (48.75)  | 38                | 1    |                 |
| <b>ER status</b>   |             |                   |      |                 |
| Negative           | 27 (33.75)  | 24                | 3    | 0.88            |
| Positive           | 53 (66.25)  | 50                | 3    |                 |
| <b>HER2 status</b> |             |                   |      |                 |
| Negative           | 47 (58.75)  | 46                | 1    | 0.56            |
| Positive           | 33 (41.25)  | 28                | 5    |                 |
| <b>OS</b>          |             |                   |      |                 |
| Alive              | 59 (73.75)  | 57                | 2    | 0.58            |
| Dead               | 21 (26.25)  | 17                | 4    |                 |

ER, estrogen receptor; PR, progesterone receptor; HER2, human epidermal growth factor receptor 2; OS, overall survival.
