# Supplementary material for: EIF4G1 Is a Potential Prognostic Biomarker of Breast Cancer
Source: MDPI journal article supplement (doi:10.3390/biom12121756), 2022-11-26
Supplement: s1 [file s1]

**Table S2.** Univariate and multivariate Cox analyses of prognostic factors in TCGA-training and meta-validation cohorts.

| Characteristic         | Univariate         |                       | Multivariate       |                       |
|------------------------|--------------------|-----------------------|--------------------|-----------------------|
|                        | HR (95% CI)        | <i>p</i> -Value       | HR (95% CI)        | <i>p</i> -Value       |
| <b>TCGA-training</b>   |                    |                       |                    |                       |
| Age                    | 1.82 (1.32 - 2.52) | 0.000285              | 2.21 (1.57 - 3.12) | 5.48×10 <sup>-6</sup> |
| Stage                  | 2.66 (1.90 - 3.72) | 1.21×10 <sup>-8</sup> | 2.76 (1.97 - 3.86) | 3.56×10 <sup>-9</sup> |
| Risk                   | 1.59 (1.16 - 2.19) | 0.00444               | 1.96 (1.40 - 2.74) | 7.86×10 <sup>-5</sup> |
| <b>Meta-validation</b> |                    |                       |                    |                       |
| Grade                  | 3.04 (0.95 - 9.71) | 0.06050               | 2.46 (0.76 - 7.95) | 0.13420               |
| Risk                   | 2.04 (1.22 - 3.41) | 0.00687               | 1.88 (1.11 - 3.16) | 0.01820               |

HR, hazard ratio; CI, confidence interval.
