# Supplementary material for: EIF4G1 Is a Potential Prognostic Biomarker of Breast Cancer
Source: Biomolecules. 2022 Nov 26;12(12):1756. doi: 10.3390/biom12121756 (PMC9776011; doi:10.3390/biom12121756)
Supplement: Supplementary file 1 [file biomolecules-12-01756-s001.zip]

Archive with 4 entries (4 files):
- Figure S1-S4.pdf
- Table S1 .xlsx
- Table S2.pdf
- Table S3.pdf
