# Supplementary material for: EIF4G1 Is a Potential Prognostic Biomarker of Breast Cancer
Source: Biomolecules. 2022 Nov 26;12(12):1756. doi: 10.3390/biom12121756 (PMC9776011; doi:10.3390/biom12121756)
Supplement: Supplementary file 1 [file biomolecules-12-01756-s001.zip › Table S1 .xlsx]

## Sheet: go1
Table S1. GO and KEGG enrichment analyses results in TCGA.
Category	ID	Description	P-value	FDR	Count
BP	GO:0006403	RNA localization	2.05711e-13	1.3361e-09	175
BP	GO:0051236	Establishment of RNA localization	6.01503e-12	1.95338e-08	151
BP	GO:0050657	Nucleic acid transport	1.90542e-11	3.09393e-08	148
BP	GO:0050658	RNA transport	1.90542e-11	3.09393e-08	148
BP	GO:0048608	Reproductive structure development	9.58162e-11	1.09996e-07	292
BP	GO:0006260	DNA replication	1.10183e-10	1.09996e-07	191
BP	GO:0061458	Reproductive system development	1.18549e-10	1.09996e-07	294
CC	GO:0005635	Nuclear envelope	2.53023e-10	1.94322e-07	308
BP	GO:0051169	Nuclear transport	2.68458e-10	2.03527e-07	240
BP	GO:0000075	Cell cycle checkpoint	2.82024e-10	2.03527e-07	157
BP	GO:0006913	Nucleocytoplasmic transport	3.15136e-10	2.04681e-07	238
BP	GO:0015931	Nucleobase-containing compound transport	4.62405e-10	2.73029e-07	182
CC	GO:0005925	Focal adhesion	1.06069e-09	4.05601e-07	272
CC	GO:0030055	Cell-substrate junction	1.58438e-09	4.05601e-07	276
BP	GO:0019693	Ribose phosphate metabolic process	9.81271e-10	5.17481e-07	279
BP	GO:0006611	Protein export from nucleus	1.03576e-09	5.17481e-07	134
BP	GO:0048732	Gland development	2.11258e-09	9.79741e-07	287
BP	GO:0007093	Mitotic cell cycle checkpoint	2.26268e-09	9.79741e-07	122
BP	GO:0060249	Anatomical structure homeostasis	3.7282e-09	1.51341e-06	301
BP	GO:0001655	Urogenital system development	4.51071e-09	1.72336e-06	220
BP	GO:0009259	Ribonucleotide metabolic process	4.84922e-09	1.74976e-06	270
BP	GO:0072521	Purine-containing compound metabolic process	5.59996e-09	1.9143e-06	302
BP	GO:0070482	Response to oxygen levels	6.2494e-09	2.02949e-06	258
BP	GO:0072331	Signal transduction by p53 class mediator	7.63695e-09	2.362e-06	182
BP	GO:0001701	In utero embryonic development	8.28245e-09	2.38145e-06	250
BP	GO:0006790	Sulfur compound metabolic process	8.43317e-09	2.38145e-06	243
BP	GO:0007389	Pattern specification process	1.12602e-08	2.97033e-06	291
BP	GO:0045787	Positive regulation of cell cycle	1.14331e-08	2.97033e-06	257
BP	GO:0003002	Regionalization	1.30051e-08	3.16595e-06	233
BP	GO:0044282	Small molecule catabolic process	1.3161e-08	3.16595e-06	289
BP	GO:0007409	Axonogenesis	1.4403e-08	3.34098e-06	306
CC	GO:0005911	Cell-cell junction	1.77476e-08	3.40753e-06	312
BP	GO:0006367	Transcription initiation from RNA polymerase II promoter	1.74242e-08	3.90242e-06	134
BP	GO:0051168	Nuclear export	1.92783e-08	4.17375e-06	143
BP	GO:0051028	MRNA transport	2.14406e-08	4.44676e-06	111
BP	GO:0001894	Tissue homeostasis	2.19086e-08	4.44676e-06	177
BP	GO:0009416	Response to light stimulus	2.45835e-08	4.83848e-06	211
BP	GO:0006163	Purine nucleotide metabolic process	2.6599e-08	5.0812e-06	282
BP	GO:0009150	Purine ribonucleotide metabolic process	3.45206e-08	6.40603e-06	258
BP	GO:0031570	DNA integrity checkpoint	3.6862e-08	6.65052e-06	116
BP	GO:0071897	DNA biosynthetic process	5.03309e-08	8.83512e-06	137
BP	GO:0036293	Response to decreased oxygen levels	5.21016e-08	8.90525e-06	240
BP	GO:0045930	Negative regulation of mitotic cell cycle	7.67557e-08	1.27828e-05	222
BP	GO:0044774	Mitotic DNA integrity checkpoint	8.59545e-08	1.39569e-05	82
BP	GO:0042493	Response to drug	9.05192e-08	1.42048e-05	254
BP	GO:0007050	Cell cycle arrest	9.18554e-08	1.42048e-05	159
BP	GO:0007178	Transmembrane receptor protein serine/threonine kinase signaling pathway	9.79581e-08	1.47962e-05	232
CC	GO:0005667	Transcription regulator complex	1.04494e-07	1.60503e-05	263
BP	GO:0001763	Morphogenesis of a branching structure	1.14021e-07	1.6831e-05	139
BP	GO:0009132	Nucleoside diphosphate metabolic process	1.2247e-07	1.76764e-05	111
BP	GO:0006090	Pyruvate metabolic process	1.41346e-07	1.99574e-05	109
BP	GO:0048511	Rhythmic process	1.50843e-07	2.08452e-05	200
BP	GO:0000086	G2/M transition of mitotic cell cycle	1.66101e-07	2.19208e-05	170
BP	GO:2000027	Regulation of animal organ morphogenesis	1.66101e-07	2.19208e-05	170
BP	GO:0006066	Alcohol metabolic process	1.68751e-07	2.19208e-05	246
BP	GO:0001666	Response to hypoxia	1.75062e-07	2.22947e-05	231
BP	GO:0061138	Morphogenesis of a branching epithelium	1.8063e-07	2.25614e-05	130
BP	GO:0006261	DNA-dependent DNA replication	2.00601e-07	2.45831e-05	108
CC	GO:0016323	Basolateral plasma membrane	2.09763e-07	2.67171e-05	165
CC	GO:0034774	Secretory granule lumen	2.67428e-07	2.67171e-05	209
CC	GO:0062023	Collagen-containing extracellular matrix	2.99627e-07	2.67171e-05	269
CC	GO:0005759	Mitochondrial matrix	3.13091e-07	2.67171e-05	295
CC	GO:0031983	Vesicle lumen	3.52766e-07	2.70924e-05	212
BP	GO:0048568	Embryonic organ development	2.35972e-07	2.83822e-05	283
BP	GO:0031647	Regulation of protein stability	2.43455e-07	2.87498e-05	194
BP	GO:0031503	Protein-containing complex localization	2.57576e-07	2.98743e-05	191
BP	GO:0006457	Protein folding	2.97554e-07	3.39055e-05	155
BP	GO:0017038	Protein import	3.37619e-07	3.756e-05	137
BP	GO:0009314	Response to radiation	3.41191e-07	3.756e-05	280
BP	GO:0072001	Renal system development	3.70764e-07	4.00621e-05	191
BP	GO:0071166	Ribonucleoprotein complex localization	3.77469e-07	4.00621e-05	95
BP	GO:0006979	Response to oxidative stress	3.82425e-07	4.00621e-05	286
CC	GO:0060205	Cytoplasmic vesicle lumen	5.77171e-07	4.0297e-05	210
BP	GO:0009952	Anterior/posterior pattern specification	4.21704e-07	4.34757e-05	148
BP	GO:0046822	Regulation of nucleocytoplasmic transport	4.46014e-07	4.52634e-05	83
BP	GO:0044773	Mitotic DNA damage checkpoint	4.79284e-07	4.78915e-05	76
BP	GO:0000077	DNA damage checkpoint	4.86736e-07	4.78993e-05	107
BP	GO:2000278	Regulation of DNA biosynthetic process	5.03427e-07	4.88024e-05	81
BP	GO:0060562	Epithelial tube morphogenesis	5.16451e-07	4.93287e-05	213
BP	GO:0010948	Negative regulation of cell cycle process	5.39415e-07	5.02688e-05	229
BP	GO:0071426	Ribonucleoprotein complex export from nucleus	5.41773e-07	5.02688e-05	94
BP	GO:0002283	Neutrophil activation involved in immune response	6.34831e-07	5.80737e-05	303
CC	GO:0098563	Intrinsic component of synaptic vesicle membrane	1.01447e-06	6.49262e-05	40
BP	GO:0043312	Neutrophil degranulation	7.34481e-07	6.62563e-05	301
CC	GO:0090575	RNA polymerase II transcription regulator complex	1.21906e-06	6.74503e-05	112
CC	GO:0005912	Adherens junction	1.22956e-06	6.74503e-05	115
CC	GO:0031965	Nuclear membrane	1.44962e-06	7.42205e-05	194
BP	GO:0009185	Ribonucleoside diphosphate metabolic process	8.79412e-07	7.82436e-05	99
BP	GO:0006405	RNA export from nucleus	9.21024e-07	7.97607e-05	102
BP	GO:0061008	Hepaticobiliary system development	9.21024e-07	7.97607e-05	102
BP	GO:0060541	Respiratory system development	9.38231e-07	8.01817e-05	138
BP	GO:0009135	Purine nucleoside diphosphate metabolic process	1.01825e-06	8.47891e-05	97
BP	GO:0009179	Purine ribonucleoside diphosphate metabolic process	1.01825e-06	8.47891e-05	97
CC	GO:0098978	Glutamatergic synapse	1.77867e-06	8.53764e-05	228
BP	GO:0001889	Liver development	1.06898e-06	8.78865e-05	100
BP	GO:0001822	Kidney development	1.10289e-06	8.95406e-05	184
BP	GO:0001890	Placenta development	1.17006e-06	9.38216e-05	109
BP	GO:0030323	Respiratory tube development	1.18603e-06	9.39419e-05	124
BP	GO:0044786	Cell cycle DNA replication	1.21909e-06	9.53977e-05	52
BP	GO:0044839	Cell cycle G2/M phase transition	1.24861e-06	9.65445e-05	178
BP	GO:0007265	Ras protein signal transduction	1.26574e-06	9.67174e-05	220
BP	GO:0016925	Protein sumoylation	1.30788e-06	9.87755e-05	63
CC	GO:0042470	Melanosome	2.35655e-06	0.000100546	77
CC	GO:0048770	Pigment granule	2.35655e-06	0.000100546	77
BP	GO:0046939	Nucleotide phosphorylation	1.43799e-06	0.000107353	96
BP	GO:1901654	Response to ketone	1.47579e-06	0.000108924	135
BP	GO:0034504	Protein localization to nucleus	1.51489e-06	0.000110553	180
BP	GO:1904029	Regulation of cyclin-dependent protein kinase activity	1.58571e-06	0.000114436	78
BP	GO:0048754	Branching morphogenesis of an epithelial tube	1.61913e-06	0.000115563	108
BP	GO:0051259	Protein complex oligomerization	1.74685e-06	0.000123323	153
CC	GO:0005775	Vacuolar lumen	3.07715e-06	0.000124382	118
BP	GO:0072073	Kidney epithelium development	1.80683e-06	0.000126187	100
BP	GO:1901990	Regulation of mitotic cell cycle phase transition	1.9195e-06	0.000131814	277
BP	GO:0044783	G1 DNA damage checkpoint	1.92799e-06	0.000131814	51
BP	GO:0032386	Regulation of intracellular transport	1.98682e-06	0.000134204	226
BP	GO:0048863	Stem cell differentiation	2.01241e-06	0.000134204	172
BP	GO:0046683	Response to organophosphorus	2.02495e-06	0.000134204	95
BP	GO:0014074	Response to purine-containing compound	2.20649e-06	0.000144759	104
BP	GO:1905330	Regulation of morphogenesis of an epithelium	2.50753e-06	0.000162864	123
BP	GO:0000079	Regulation of cyclin-dependent protein serine/threonine kinase activity	2.63078e-06	0.000167574	75
BP	GO:0000070	Mitotic sister chromatid segregation	2.63165e-06	0.000167574	111
BP	GO:0045216	Cell-cell junction organization	2.75776e-06	0.0001739	140
BP	GO:0006165	Nucleoside diphosphate phosphorylation	2.84322e-06	0.000177565	94
BP	GO:0072006	Nephron development	3.00458e-06	0.000185159	100
BP	GO:0031571	Mitotic G1 DNA damage checkpoint	3.03785e-06	0.000185159	50
BP	GO:0140014	Mitotic nuclear division	3.06322e-06	0.000185159	184
BP	GO:0031667	Response to nutrient levels	3.07886e-06	0.000185159	290
CC	GO:0016324	Apical plasma membrane	4.94573e-06	0.000187329	226
CC	GO:0030285	Integral component of synaptic vesicle membrane	5.12229e-06	0.000187329	30
BP	GO:0033260	Nuclear DNA replication	3.14916e-06	0.000187649	48
BP	GO:0072431	Signal transduction involved in mitotic G1 DNA damage checkpoint	3.21693e-06	0.000188234	46
BP	GO:1902400	Intracellular signal transduction involved in G1 DNA damage checkpoint	3.21693e-06	0.000188234	46
CC	GO:0045177	Apical part of cell	6.54224e-06	0.000228384	266
BP	GO:0030324	Lung development	3.96281e-06	0.000229808	120
BP	GO:0007043	Cell-cell junction assembly	4.20615e-06	0.000241532	102
BP	GO:0045494	Photoreceptor cell maintenance	4.23937e-06	0.000241532	35
BP	GO:0007623	Circadian rhythm	4.35693e-06	0.000246072	144
BP	GO:0046031	ADP metabolic process	4.45765e-06	0.00024959	88
BP	GO:0042254	Ribosome biogenesis	4.69566e-06	0.000260669	197
BP	GO:0072413	Signal transduction involved in mitotic cell cycle checkpoint	4.9819e-06	0.000267691	47
BP	GO:1902402	Signal transduction involved in mitotic DNA damage checkpoint	4.9819e-06	0.000267691	47
BP	GO:1902403	Signal transduction involved in mitotic DNA integrity checkpoint	4.9819e-06	0.000267691	47
BP	GO:1904951	Positive regulation of establishment of protein localization	4.98701e-06	0.000267691	231
BP	GO:0006977	DNA damage response, signal transduction by p53 class mediator resulting in cell cycle arrest	5.1329e-06	0.000271042	45
BP	GO:0090183	Regulation of kidney development	5.1329e-06	0.000271042	45
BP	GO:0042391	Regulation of membrane potential	5.24527e-06	0.000274742	272
BP	GO:0032526	Response to retinoic acid	5.29164e-06	0.000274954	78
BP	GO:0043434	Response to peptide hormone	5.8435e-06	0.000301218	274
BP	GO:0010389	Regulation of G2/M transition of mitotic cell cycle	5.90359e-06	0.00030192	133
BP	GO:0048545	Response to steroid hormone	6.09502e-06	0.000309275	217
BP	GO:1901796	Regulation of signal transduction by p53 class mediator	6.90994e-06	0.000344213	121
BP	GO:0071560	Cellular response to transforming growth factor beta stimulus	6.92425e-06	0.000344213	163
BP	GO:0006096	Glycolytic process	6.95672e-06	0.000344213	82
BP	GO:0044819	Mitotic G1/S transition checkpoint	7.00162e-06	0.000344213	50
BP	GO:0002064	Epithelial cell development	7.04856e-06	0.000344213	145
CC	GO:0005811	Lipid droplet	1.07261e-05	0.000346307	68
CC	GO:0005643	Nuclear pore	1.08221e-05	0.000346307	63
BP	GO:0090184	Positive regulation of kidney development	7.14641e-06	0.000346388	34
BP	GO:0050821	Protein stabilization	7.54412e-06	0.000361666	125
BP	GO:0090092	Regulation of transmembrane receptor protein serine/threonine kinase signaling pathway	7.58202e-06	0.000361666	164
BP	GO:0051656	Establishment of organelle localization	7.62868e-06	0.000361666	265
BP	GO:0099504	Synaptic vesicle cycle	7.78171e-06	0.000366248	132
BP	GO:0016054	Organic acid catabolic process	8.01041e-06	0.000371626	180
BP	GO:0046395	Carboxylic acid catabolic process	8.01041e-06	0.000371626	180
BP	GO:0030850	Prostate gland development	8.37135e-06	0.000385616	40
CC	GO:0005657	Replication fork	1.2836e-05	0.000394323	54
BP	GO:0071559	Response to transforming growth factor beta	9.05182e-06	0.000414025	166
BP	GO:0099003	Vesicle-mediated transport in synapse	9.16787e-06	0.000414592	144
BP	GO:0062012	Regulation of small molecule metabolic process	9.19187e-06	0.000414592	278
CC	GO:0101031	Chaperone complex	1.4671e-05	0.000433359	23
BP	GO:0050808	Synapse organization	9.7848e-06	0.000438292	265
BP	GO:0032388	Positive regulation of intracellular transport	1.014e-05	0.00045109	145
BP	GO:0046660	Female sex differentiation	1.02245e-05	0.000451754	84
BP	GO:0006836	Neurotransmitter transport	1.05198e-05	0.000458032	149
BP	GO:0048762	Mesenchymal cell differentiation	1.05198e-05	0.000458032	149
BP	GO:0043923	Positive regulation by host of viral transcription	1.05781e-05	0.000458032	17
BP	GO:1901215	Negative regulation of neuron death	1.13989e-05	0.000490304	139
BP	GO:0006757	ATP generation from ADP	1.18977e-05	0.000508392	82
BP	GO:0048013	Ephrin receptor signaling pathway	1.37347e-05	0.00058305	64
KEGG	hsa04110	Cell cycle	2.00217e-06	0.000585503	96
KEGG	hsa03030	DNA replication	3.50601e-06	0.000585503	33
CC	GO:0043596	Nuclear replication fork	2.1492e-05	0.00058967	34
CC	GO:0031091	Platelet alpha granule	2.24053e-05	0.00058967	66
CC	GO:0000151	Ubiquitin ligase complex	2.24294e-05	0.00058967	181
CC	GO:0005874	Microtubule	2.3034e-05	0.00058967	262
KEGG	hsa03013	Nucleocytoplasmic transport	5.41818e-06	0.000603224	83
BP	GO:2000736	Regulation of stem cell differentiation	1.43035e-05	0.000603257	83
BP	GO:0046474	Glycerophospholipid biosynthetic process	1.49045e-05	0.000624546	149
BP	GO:0070997	Neuron death	1.55594e-05	0.00064781	223
BP	GO:1901991	Negative regulation of mitotic cell cycle phase transition	1.58049e-05	0.000653838	161
BP	GO:0009914	Hormone transport	1.63235e-05	0.000671018	202
BP	GO:0002244	Hematopoietic progenitor cell differentiation	1.68974e-05	0.000690242	115
CC	GO:0034399	Nuclear periphery	2.85176e-05	0.000706501	90
CC	GO:0061695	Transferase complex, transferring phosphorus-containing groups	3.08342e-05	0.000740021	161
BP	GO:0010038	Response to metal ion	1.85755e-05	0.000754049	226
BP	GO:0034404	Nucleobase-containing small molecule biosynthetic process	1.8695e-05	0.000754186	76
BP	GO:0090305	Nucleic acid phosphodiester bond hydrolysis	1.92883e-05	0.000773316	196
CC	GO:0005766	Primary lysosome	3.42426e-05	0.000773479	104
CC	GO:0042582	Azurophil granule	3.42426e-05	0.000773479	104
CC	GO:0035770	Ribonucleoprotein granule	3.58542e-05	0.000786744	155
BP	GO:1902749	Regulation of cell cycle G2/M phase transition	1.98963e-05	0.000792801	141
BP	GO:0097064	NcRNA export from nucleus	2.00608e-05	0.000794481	32
BP	GO:0033157	Regulation of intracellular protein transport	2.03446e-05	0.000796581	168
BP	GO:0008654	Phospholipid biosynthetic process	2.03591e-05	0.000796581	172
BP	GO:0016072	RRNA metabolic process	2.13361e-05	0.000829808	153
BP	GO:0051047	Positive regulation of secretion	2.19773e-05	0.000849658	211
BP	GO:0051170	Import into nucleus	2.24026e-05	0.000860975	114
BP	GO:0043524	Negative regulation of neuron apoptotic process	2.26288e-05	0.000864554	101
BP	GO:0005996	Monosaccharide metabolic process	2.30798e-05	0.000875312	186
BP	GO:0098693	Regulation of synaptic vesicle cycle	2.32751e-05	0.000875312	80
BP	GO:0032835	Glomerulus development	2.33147e-05	0.000875312	49
BP	GO:0007568	Aging	2.35063e-05	0.000877434	199
BP	GO:0007179	Transforming growth factor beta receptor signaling pathway	2.39591e-05	0.000889224	132
BP	GO:0099111	Microtubule-based transport	2.42279e-05	0.00089409	125
BP	GO:0046879	Hormone secretion	2.55775e-05	0.000938565	196
BP	GO:0071156	Regulation of cell cycle arrest	2.63234e-05	0.00096051	75
CC	GO:0031300	Intrinsic component of organelle membrane	4.53042e-05	0.000966489	242
BP	GO:0051604	Protein maturation	2.68552e-05	0.00097444	184
BP	GO:0043010	Camera-type eye development	2.77573e-05	0.000999578	206
BP	GO:1901987	Regulation of cell cycle phase transition	2.78558e-05	0.000999578	292
BP	GO:2000573	Positive regulation of DNA biosynthetic process	2.85734e-05	0.00101969	52
BP	GO:0071383	Cellular response to steroid hormone stimulus	2.91694e-05	0.00102602	134
BP	GO:0001657	Ureteric bud development	2.92245e-05	0.00102602	70
BP	GO:0006835	Dicarboxylic acid transport	2.92245e-05	0.00102602	70
BP	GO:0001678	Cellular glucose homeostasis	2.95007e-05	0.00102877	103
BP	GO:2000241	Regulation of reproductive process	2.96197e-05	0.00102877	113
BP	GO:0006409	TRNA export from nucleus	3.06143e-05	0.00105206	29
BP	GO:0071431	TRNA-containing ribonucleoprotein complex export from nucleus	3.06143e-05	0.00105206	29
BP	GO:0006364	RRNA processing	3.13837e-05	0.00107283	146
BP	GO:1903532	Positive regulation of secretion by cell	3.16686e-05	0.0010769	195
BP	GO:0060425	Lung morphogenesis	3.1909e-05	0.00107942	41
CC	GO:0101002	Ficolin-1-rich granule	5.34778e-05	0.00108081	85
CC	GO:1904813	Ficolin-1-rich granule lumen	5.34778e-05	0.00108081	85
BP	GO:0072175	Epithelial tube formation	3.2446e-05	0.0010919	91
BP	GO:0007052	Mitotic spindle organization	3.27893e-05	0.00109776	82
BP	GO:0051222	Positive regulation of protein transport	3.31773e-05	0.00110506	218
BP	GO:0051031	TRNA transport	3.33913e-05	0.00110599	31
BP	GO:0072395	Signal transduction involved in cell cycle checkpoint	3.35459e-05	0.00110599	55
CC	GO:0030684	Preribosome	5.6213e-05	0.00110696	57
BP	GO:0006606	Protein import into nucleus	3.4678e-05	0.00113754	101
BP	GO:0021700	Developmental maturation	3.63434e-05	0.00118618	180
BP	GO:0032201	Telomere maintenance via semi-conservative replication	3.69201e-05	0.00119898	24
BP	GO:0034605	Cellular response to heat	3.84593e-05	0.00123955	86
BP	GO:0099177	Regulation of trans-synaptic signaling	3.85509e-05	0.00123955	274
BP	GO:0062197	Cellular response to chemical stress	3.91946e-05	0.00125403	221
CC	GO:0043195	Terminal bouton	6.60804e-05	0.00126874	43
BP	GO:0016052	Carbohydrate catabolic process	4.01458e-05	0.00127817	130
BP	GO:0061005	Cell differentiation involved in kidney development	4.26956e-05	0.00134616	44
BP	GO:0075733	Intracellular transport of virus	4.26956e-05	0.00134616	44
BP	GO:0001505	Regulation of neurotransmitter levels	4.39257e-05	0.00137825	150
BP	GO:0034329	Cell junction assembly	4.42977e-05	0.00138324	262
BP	GO:1900180	Regulation of protein localization to nucleus	4.47103e-05	0.00138944	87
BP	GO:0006575	Cellular modified amino acid metabolic process	4.54902e-05	0.00140695	124
BP	GO:0050804	Modulation of chemical synaptic transmission	4.60576e-05	0.0014137	273
BP	GO:0051260	Protein homooligomerization	4.61439e-05	0.0014137	117
BP	GO:0003007	Heart morphogenesis	4.73917e-05	0.00144511	163
BP	GO:0051591	Response to cAMP	4.80737e-05	0.00145906	67
CC	GO:0098589	Membrane region	7.8392e-05	0.00146842	210
BP	GO:0003208	Cardiac ventricle morphogenesis	4.94217e-05	0.00147924	54
BP	GO:0072401	Signal transduction involved in DNA integrity checkpoint	4.94217e-05	0.00147924	54
BP	GO:0072422	Signal transduction involved in DNA damage checkpoint	4.94217e-05	0.00147924	54
BP	GO:1902893	Regulation of pri-miRNA transcription by RNA polymerase II	4.98205e-05	0.00148049	40
BP	GO:0072163	Mesonephric epithelium development	5.01475e-05	0.00148049	70
BP	GO:0072164	Mesonephric tubule development	5.01475e-05	0.00148049	70
BP	GO:0071902	Positive regulation of protein serine/threonine kinase activity	5.11302e-05	0.00149678	212
BP	GO:0060485	Mesenchyme development	5.16036e-05	0.00149678	181
BP	GO:0006637	Acyl-CoA metabolic process	5.16212e-05	0.00149678	73
BP	GO:0035383	Thioester metabolic process	5.16212e-05	0.00149678	73
BP	GO:0016331	Morphogenesis of embryonic epithelium	5.24408e-05	0.00150844	101
BP	GO:0022612	Gland morphogenesis	5.24875e-05	0.00150844	85
BP	GO:1903829	Positive regulation of cellular protein localization	5.28296e-05	0.00150912	208
BP	GO:0006271	DNA strand elongation involved in DNA replication	5.29761e-05	0.00150912	18
BP	GO:1904589	Regulation of protein import	5.33846e-05	0.00151412	47
BP	GO:1990778	Protein localization to cell periphery	5.58619e-05	0.00157749	209
BP	GO:0018209	Peptidyl-serine modification	5.77019e-05	0.0016224	205
BP	GO:0031023	Microtubule organizing center organization	5.80765e-05	0.00162589	92
BP	GO:0042306	Regulation of protein import into nucleus	5.92377e-05	0.00164991	45
BP	GO:0018105	Peptidyl-serine phosphorylation	5.94425e-05	0.00164991	192
BP	GO:0009636	Response to toxic substance	5.98524e-05	0.00165422	158
BP	GO:0048880	Sensory system development	6.04788e-05	0.00166399	239
BP	GO:0000819	Sister chromatid segregation	6.07183e-05	0.00166399	127
BP	GO:0032392	DNA geometric change	6.20676e-05	0.00169382	80
BP	GO:0051402	Neuron apoptotic process	6.48128e-05	0.00175888	155
BP	GO:1901214	Regulation of neuron death	6.49934e-05	0.00175888	198
BP	GO:0016049	Cell growth	6.52677e-05	0.00175898	292
BP	GO:0033865	Nucleoside bisphosphate metabolic process	6.62824e-05	0.00176436	93
BP	GO:0033875	Ribonucleoside bisphosphate metabolic process	6.62824e-05	0.00176436	93
BP	GO:0034032	Purine nucleoside bisphosphate metabolic process	6.62824e-05	0.00176436	93
BP	GO:0051056	Regulation of small GTPase mediated signal transduction	6.88226e-05	0.0018245	199
BP	GO:0035148	Tube formation	6.95991e-05	0.00183759	100
BP	GO:0009743	Response to carbohydrate	7.02824e-05	0.00184812	148
BP	GO:0043467	Regulation of generation of precursor metabolites and energy	7.09638e-05	0.00185851	107
BP	GO:0061614	Pri-miRNA transcription by RNA polymerase II	7.1431e-05	0.00186162	41
BP	GO:0001823	Mesonephros development	7.18836e-05	0.00186162	72
BP	GO:0001654	Eye development	7.24672e-05	0.00186162	233
BP	GO:0071322	Cellular response to carbohydrate stimulus	7.25474e-05	0.00186162	97
BP	GO:0006406	MRNA export from nucleus	7.28025e-05	0.00186162	78
BP	GO:0071427	MRNA-containing ribonucleoprotein complex export from nucleus	7.28025e-05	0.00186162	78
BP	GO:0031589	Cell-substrate adhesion	7.41513e-05	0.00188868	219
BP	GO:0016053	Organic acid biosynthetic process	7.49617e-05	0.00189298	224
BP	GO:0090068	Positive regulation of cell cycle process	7.50965e-05	0.00189298	187
BP	GO:0009411	Response to UV	7.53529e-05	0.00189298	94
BP	GO:0045444	Fat cell differentiation	7.58992e-05	0.00189298	149
BP	GO:0071453	Cellular response to oxygen levels	7.58992e-05	0.00189298	149
BP	GO:0071478	Cellular response to radiation	7.6069e-05	0.00189298	122
BP	GO:0043161	Proteasome-mediated ubiquitin-dependent protein catabolic process	7.94922e-05	0.0019681	255
BP	GO:0150063	Visual system development	7.96936e-05	0.0019681	235
BP	GO:0006027	Glycosaminoglycan catabolic process	8.0222e-05	0.00197364	46
BP	GO:1903578	Regulation of ATP metabolic process	8.22975e-05	0.00201707	85
BP	GO:0035850	Epithelial cell differentiation involved in kidney development	8.29407e-05	0.00202519	37
BP	GO:0097193	Intrinsic apoptotic signaling pathway	8.40299e-05	0.0020441	180
CC	GO:0000775	Chromosome, centromeric region	0.000111863	0.0020455	126
BP	GO:0006900	Vesicle budding from membrane	8.53928e-05	0.00206181	76
BP	GO:0072009	Nephron epithelium development	8.53928e-05	0.00206181	76
BP	GO:1903313	Positive regulation of mRNA metabolic process	8.67877e-05	0.00208108	59
BP	GO:0048193	Golgi vesicle transport	8.68318e-05	0.00208108	227
CC	GO:1902911	Protein kinase complex	0.00011938	0.00208671	72
CC	GO:0150034	Distal axon	0.000119551	0.00208671	190
CC	GO:0036464	Cytoplasmic ribonucleoprotein granule	0.000122969	0.00209867	147
BP	GO:0009408	Response to heat	8.79913e-05	0.00210112	109
BP	GO:0071326	Cellular response to monosaccharide stimulus	8.86462e-05	0.002109	92
BP	GO:0046394	Carboxylic acid biosynthetic process	9.05421e-05	0.0021414	223
BP	GO:0033574	Response to testosterone	9.10043e-05	0.0021414	33
BP	GO:0009112	Nucleobase metabolic process	9.11974e-05	0.0021414	29
BP	GO:0061448	Connective tissue development	9.13267e-05	0.0021414	164
KEGG	hsa05212	Pancreatic cancer	2.5718e-05	0.00214746	60
BP	GO:0010970	Transport along microtubule	9.30226e-05	0.00217332	106
BP	GO:0046824	Positive regulation of nucleocytoplasmic transport	9.38831e-05	0.00218556	49
CC	GO:0043202	Lysosomal lumen	0.000138844	0.00223003	67
CC	GO:0000307	Cyclin-dependent protein kinase holoenzyme complex	0.000139475	0.00223003	34
CC	GO:0005819	Spindle	0.00014228	0.00223003	222
CC	GO:0031301	Integral component of organelle membrane	0.00014228	0.00223003	222
BP	GO:0046486	Glycerolipid metabolic process	9.82137e-05	0.00227821	260
BP	GO:0006275	Regulation of DNA replication	9.97299e-05	0.00230515	77
BP	GO:0071482	Cellular response to light stimulus	0.000107885	0.0024848	87
BP	GO:0042593	Glucose homeostasis	0.000109383	0.00250482	154
BP	GO:0006301	Postreplication repair	0.000109526	0.00250482	40
CC	GO:0098857	Membrane microdomain	0.000167062	0.00256607	201
BP	GO:0007411	Axon guidance	0.000112898	0.00257289	176
CC	GO:0098687	Chromosomal region	0.000178017	0.00264281	212
CC	GO:0031093	Platelet alpha granule lumen	0.00017894	0.00264281	49
BP	GO:0006650	Glycerophospholipid metabolic process	0.000117602	0.00267072	209
BP	GO:0071331	Cellular response to hexose stimulus	0.000118164	0.00267315	91
BP	GO:1901988	Negative regulation of cell cycle phase transition	0.000118532	0.00267315	168
BP	GO:0003206	Cardiac chamber morphogenesis	0.000122734	0.00275834	88
BP	GO:0034644	Cellular response to UV	0.000123912	0.00276567	58
BP	GO:0071158	Positive regulation of cell cycle arrest	0.000123912	0.00276567	58
BP	GO:0006352	DNA-templated transcription, initiation	0.000125558	0.00279281	156
BP	GO:0034284	Response to monosaccharide	0.000130505	0.00289066	132
BP	GO:0033044	Regulation of chromosome organization	0.000130847	0.00289066	216
BP	GO:0099560	Synaptic membrane adhesion	0.000132686	0.00292135	24
BP	GO:0022604	Regulation of cell morphogenesis	0.000133258	0.00292403	295
CC	GO:0045121	Membrane raft	0.000201894	0.00292556	200
BP	GO:0048645	Animal organ formation	0.000138274	0.00302387	48
BP	GO:1901136	Carbohydrate derivative catabolic process	0.000139496	0.00304037	125
BP	GO:0001895	Retina homeostasis	0.000143687	0.00312124	56
BP	GO:0006284	Base-excision repair	0.000145086	0.00313067	32
BP	GO:0042307	Positive regulation of protein import into nucleus	0.000145086	0.00313067	32
BP	GO:0033500	Carbohydrate homeostasis	0.000146063	0.00314132	154
MF	GO:0044389	Ubiquitin-like protein ligase binding	5.18713e-06	0.00314502	208
MF	GO:0031625	Ubiquitin protein ligase binding	7.46743e-06	0.00314502	196
MF	GO:0016887	ATPase activity	9.21797e-06	0.00314502	270
MF	GO:0000287	Magnesium ion binding	1.284e-05	0.00314502	147
MF	GO:0017116	Single-stranded DNA helicase activity	1.29106e-05	0.00314502	18
BP	GO:0097485	Neuron projection guidance	0.000147294	0.00315733	176
BP	GO:0098727	Maintenance of cell number	0.000149032	0.00318122	107
BP	GO:0006140	Regulation of nucleotide metabolic process	0.000149387	0.00318122	83
BP	GO:0070507	Regulation of microtubule cytoskeleton organization	0.000150021	0.00318426	122
BP	GO:0030856	Regulation of epithelial cell differentiation	0.000154085	0.00325987	111
BP	GO:0032508	DNA duplex unwinding	0.000159971	0.0033734	74
BP	GO:0032984	Protein-containing complex disassembly	0.000162071	0.00340664	201
MF	GO:0043021	Ribonucleoprotein complex binding	1.71481e-05	0.00348106	95
BP	GO:0043627	Response to estrogen	0.000166443	0.00348725	54
BP	GO:0009161	Ribonucleoside monophosphate metabolic process	0.000167068	0.00348909	39
BP	GO:0001838	Embryonic epithelial tube formation	0.000170037	0.00352839	84
BP	GO:0007098	Centrosome cycle	0.000170037	0.00352839	84
BP	GO:0045137	Development of primary sexual characteristics	0.00017495	0.00361878	144
BP	GO:0006110	Regulation of glycolytic process	0.00017613	0.00362014	57
BP	GO:1900182	Positive regulation of protein localization to nucleus	0.00017613	0.00362014	57
BP	GO:0006026	Aminoglycan catabolic process	0.000176756	0.00362154	49
BP	GO:0001658	Branching involved in ureteric bud morphogenesis	0.000178512	0.00364603	44
BP	GO:0071772	Response to BMP	0.000180901	0.00367173	109
BP	GO:0071773	Cellular response to BMP stimulus	0.000180901	0.00367173	109
BP	GO:0072527	Pyrimidine-containing compound metabolic process	0.000183039	0.00370354	60
BP	GO:0090100	Positive regulation of transmembrane receptor protein serine/threonine kinase signaling pathway	0.000185047	0.00371822	75
BP	GO:0007269	Neurotransmitter secretion	0.000185482	0.00371822	113
BP	GO:0099643	Signal release from synapse	0.000185482	0.00371822	113
BP	GO:0043470	Regulation of carbohydrate catabolic process	0.000187402	0.00373482	63
BP	GO:1902850	Microtubule cytoskeleton organization involved in mitosis	0.000187865	0.00373482	95
BP	GO:0046545	Development of primary female sexual characteristics	0.000188035	0.00373482	72
BP	GO:0090316	Positive regulation of intracellular protein transport	0.000188914	0.00374084	117
BP	GO:0045017	Glycerolipid biosynthetic process	0.000191575	0.003766	167
BP	GO:0000281	Mitotic cytokinesis	0.00019257	0.003766	52
BP	GO:0009123	Nucleoside monophosphate metabolic process	0.00019257	0.003766	52
BP	GO:0006109	Regulation of carbohydrate metabolic process	0.000192755	0.003766	133
BP	GO:0021915	Neural tube development	0.000193084	0.003766	106
MF	GO:0043024	Ribosomal small subunit binding	2.41399e-05	0.0037999	17
MF	GO:0033218	Amide binding	2.7368e-05	0.0037999	243
MF	GO:0140297	DNA-binding transcription factor binding	2.80781e-05	0.0037999	223
BP	GO:0043401	Steroid hormone mediated signaling pathway	0.000197887	0.00384814	92
BP	GO:0046794	Transport of virus	0.000202655	0.00391739	47
BP	GO:0051306	Mitotic sister chromatid separation	0.000202655	0.00391739	47
CC	GO:0071682	Endocytic vesicle lumen	0.000276413	0.0039312	18
BP	GO:0032147	Activation of protein kinase activity	0.000205785	0.0039661	201
CC	GO:0031225	Anchored component of membrane	0.000284553	0.00397339	110
BP	GO:0071333	Cellular response to glucose stimulus	0.000207839	0.00399383	89
CC	GO:0005681	Spliceosomal complex	0.000291409	0.00399646	122
BP	GO:0120193	Tight junction organization	0.000213629	0.00408629	58
BP	GO:1901617	Organic hydroxy compound biosynthetic process	0.000214708	0.00408629	160
BP	GO:0000302	Response to reactive oxygen species	0.000214964	0.00408629	147
BP	GO:0001709	Cell fate determination	0.000216487	0.00408629	33
BP	GO:1904591	Positive regulation of protein import	0.000216487	0.00408629	33
BP	GO:0048285	Organelle fission	0.000216834	0.00408629	281
BP	GO:0002576	Platelet degranulation	0.00021758	0.00408629	86
BP	GO:0051983	Regulation of chromosome segregation	0.000217684	0.00408629	73
BP	GO:0032355	Response to estradiol	0.000221063	0.00413776	93
BP	GO:0043523	Regulation of neuron apoptotic process	0.000223579	0.00417284	135
BP	GO:0010971	Positive regulation of G2/M transition of mitotic cell cycle	0.00022491	0.00418565	23
BP	GO:0030705	Cytoskeleton-dependent intracellular transport	0.000225687	0.00418811	127
CC	GO:0035578	Azurophil granule lumen	0.000311417	0.00419594	63
BP	GO:0015849	Organic acid transport	0.000227321	0.0042064	213
BP	GO:0009163	Nucleoside biosynthetic process	0.000230028	0.00423326	31
BP	GO:0034470	NcRNA processing	0.000230076	0.00423326	239
BP	GO:0010965	Regulation of mitotic sister chromatid separation	0.000231757	0.00424018	45
BP	GO:0051310	Metaphase plate congression	0.000231757	0.00424018	45
BP	GO:0090287	Regulation of cellular response to growth factor stimulus	0.000232475	0.00424137	189
BP	GO:0001558	Regulation of cell growth	0.000233268	0.00424391	250
CC	GO:0097060	Synaptic membrane	0.000324943	0.00430269	231
BP	GO:1902751	Positive regulation of cell cycle G2/M phase transition	0.000239829	0.00435108	25
MF	GO:0008187	Poly-pyrimidine tract binding	3.61762e-05	0.00440626	26
BP	GO:0009746	Response to hexose	0.000243701	0.00440901	128
CC	GO:0030687	Preribosome, large subunit precursor	0.000342336	0.00443976	20
CC	GO:0000776	Kinetochore	0.000346856	0.00443976	90
MF	GO:0051861	Glycolipid binding	4.03425e-05	0.00446701	23
BP	GO:1900034	Regulation of cellular response to heat	0.00024921	0.004487	56
BP	GO:0019827	Stem cell population maintenance	0.000249393	0.004487	105
BP	GO:0007548	Sex differentiation	0.000255258	0.00452973	172
BP	GO:0001824	Blastocyst development	0.000256113	0.00452973	71
BP	GO:0009116	Nucleoside metabolic process	0.000256113	0.00452973	71
BP	GO:0140029	Exocytic process	0.000256606	0.00452973	59
BP	GO:0044766	Multi-organism transport	0.00025665	0.00452973	48
BP	GO:1902579	Multi-organism localization	0.00025665	0.00452973	48
BP	GO:1905818	Regulation of chromosome separation	0.00025665	0.00452973	48
BP	GO:0046942	Carboxylic acid transport	0.000260462	0.00456221	211
BP	GO:0014033	Neural crest cell differentiation	0.000260551	0.00456221	62
BP	GO:0019058	Viral life cycle	0.000260598	0.00456221	206
MF	GO:0001161	Intronic transcription regulatory region sequence-specific DNA binding	4.5134e-05	0.00458111	16
BP	GO:0009749	Response to glucose	0.000263742	0.00459169	125
BP	GO:0007091	Metaphase/anaphase transition of mitotic cell cycle	0.000264249	0.00459169	43
BP	GO:0030072	Peptide hormone secretion	0.000264402	0.00459169	159
MF	GO:0042626	ATPase-coupled transmembrane transporter activity	4.90805e-05	0.00459846	73
BP	GO:1900542	Regulation of purine nucleotide metabolic process	0.000267286	0.00462939	81
BP	GO:0042770	Signal transduction in response to DNA damage	0.00027422	0.00473312	88
BP	GO:0016082	Synaptic vesicle priming	0.000274732	0.00473312	18
BP	GO:0007080	Mitotic metaphase plate congression	0.000281397	0.00483511	36
BP	GO:0043687	Post-translational protein modification	0.000283214	0.0048535	218
BP	GO:0044272	Sulfur compound biosynthetic process	0.000285265	0.00487579	122
CC	GO:0000779	Condensed chromosome, centromeric region	0.000406338	0.00503334	81
CC	GO:0005923	Bicellular tight junction	0.000406338	0.00503334	81
BP	GO:0071466	Cellular response to xenobiotic stimulus	0.000301794	0.00514476	82
BP	GO:1901532	Regulation of hematopoietic progenitor cell differentiation	0.000305476	0.0051939	60
BP	GO:0045682	Regulation of epidermis development	0.000307092	0.00520774	63
BP	GO:0046578	Regulation of Ras protein signal transduction	0.00030819	0.00521275	123
BP	GO:0009124	Nucleoside monophosphate biosynthetic process	0.000309752	0.00522555	34
BP	GO:0071214	Cellular response to abiotic stimulus	0.000312673	0.00524758	200
BP	GO:0104004	Cellular response to environmental stimulus	0.000312673	0.00524758	200
CC	GO:0070160	Tight junction	0.000431601	0.00526142	85
BP	GO:0009410	Response to xenobiotic stimulus	0.000322889	0.00540505	86
BP	GO:0098656	Anion transmembrane transport	0.000325827	0.00543299	191
BP	GO:0045931	Positive regulation of mitotic cell cycle	0.000327066	0.00543299	108
BP	GO:0001676	Long-chain fatty acid metabolic process	0.000327067	0.00543299	76
BP	GO:0030522	Intracellular receptor signaling pathway	0.000333384	0.0055238	163
BP	GO:0072528	Pyrimidine-containing compound biosynthetic process	0.000337376	0.00555797	32
BP	GO:2000242	Negative regulation of reproductive process	0.000339506	0.00555797	44
BP	GO:0090329	Regulation of DNA-dependent DNA replication	0.000339696	0.00555797	39
BP	GO:0015813	L-glutamate transmembrane transport	0.000340115	0.00555797	20
BP	GO:0072215	Regulation of metanephros development	0.000340115	0.00555797	20
BP	GO:0030900	Forebrain development	0.000340581	0.00555797	233
BP	GO:0007088	Regulation of mitotic nuclear division	0.000351332	0.00571905	105
BP	GO:0046883	Regulation of hormone secretion	0.000352514	0.00572395	164
BP	GO:0006720	Isoprenoid metabolic process	0.000355793	0.00572875	94
BP	GO:0046434	Organophosphate catabolic process	0.000355793	0.00572875	94
BP	GO:0016236	Macroautophagy	0.000356836	0.00572875	188
BP	GO:0034599	Cellular response to oxidative stress	0.000356836	0.00572875	188
BP	GO:0007031	Peroxisome organization	0.000358102	0.00572875	58
BP	GO:2000243	Positive regulation of reproductive process	0.000358102	0.00572875	58
BP	GO:0006644	Phospholipid metabolic process	0.000364541	0.00581743	268
BP	GO:0090181	Regulation of cholesterol metabolic process	0.000370759	0.00590216	47
MF	GO:0061629	RNA polymerase II-specific DNA-binding transcription factor binding	6.78609e-05	0.0059039	174
BP	GO:0060070	Canonical Wnt signaling pathway	0.000374233	0.00594289	204
BP	GO:0031668	Cellular response to extracellular stimulus	0.000376082	0.00595768	156
CC	GO:0000793	Condensed chromosome	0.000497598	0.00597117	138
BP	GO:0022616	DNA strand elongation	0.00037911	0.00597651	22
BP	GO:0060390	Regulation of SMAD protein signal transduction	0.00037911	0.00597651	22
BP	GO:0017015	Regulation of transforming growth factor beta receptor signaling pathway	0.000380266	0.00598022	84
BP	GO:0042462	Eye photoreceptor cell development	0.000382997	0.00600861	28
BP	GO:0006289	Nucleotide-excision repair	0.000385375	0.00603135	74
BP	GO:0008406	Gonad development	0.000392983	0.00613563	139
BP	GO:0010498	Proteasomal protein catabolic process	0.000407433	0.006346	283
BP	GO:0008585	Female gonad development	0.000409175	0.00635787	68
BP	GO:0031100	Animal organ regeneration	0.000410213	0.0063588	53
BP	GO:0003151	Outflow tract morphogenesis	0.00041973	0.00647842	56
BP	GO:0051783	Regulation of nuclear division	0.000420718	0.00647842	119
BP	GO:0003205	Cardiac chamber development	0.000420923	0.00647842	111
BP	GO:1903844	Regulation of cellular response to transforming growth factor beta stimulus	0.000424519	0.00651832	85
BP	GO:0006220	Pyrimidine nucleotide metabolic process	0.000427855	0.00651993	35
BP	GO:0007601	Visual perception	0.000428131	0.00651993	136
BP	GO:0036294	Cellular response to decreased oxygen levels	0.000428131	0.00651993	136
BP	GO:0051851	Modulation by host of symbiont process	0.000428639	0.00651993	45
BP	GO:0010506	Regulation of autophagy	0.000444256	0.0067417	208
CC	GO:1990351	Transporter complex	0.000576101	0.0067461	198
CC	GO:1902554	Serine/threonine protein kinase complex	0.000586387	0.0067461	61
CC	GO:0042575	DNA polymerase complex	0.000588527	0.0067461	19
CC	GO:0000777	Condensed chromosome kinetochore	0.00061652	0.00682663	71
CC	GO:0044306	Neuron projection terminus	0.000620569	0.00682663	96
CC	GO:0043679	Axon terminus	0.000626509	0.00682663	85
CC	GO:0045211	Postsynaptic membrane	0.000631552	0.00682663	170
CC	GO:0005777	Peroxisome	0.000648885	0.00682663	89
CC	GO:0042579	Microbody	0.000648885	0.00682663	89
BP	GO:0006631	Fatty acid metabolic process	0.00045102	0.00682838	235
BP	GO:0030330	DNA damage response, signal transduction by p53 class mediator	0.000454182	0.00686026	72
BP	GO:0007051	Spindle organization	0.000455707	0.00686732	116
BP	GO:0046887	Positive regulation of hormone secretion	0.000472305	0.00710097	86
BP	GO:0034660	NcRNA metabolic process	0.000474796	0.00712195	288
BP	GO:0009119	Ribonucleoside metabolic process	0.000479253	0.00715574	51
BP	GO:0043574	Peroxisomal transport	0.000479253	0.00715574	51
BP	GO:0098739	Import across plasma membrane	0.000483641	0.00720469	101
BP	GO:0050953	Sensory perception of light stimulus	0.000486688	0.0072335	138
BP	GO:0007422	Peripheral nervous system development	0.000491872	0.00729386	54
BP	GO:0030004	Cellular monovalent inorganic cation homeostasis	0.000493776	0.00730542	76
CC	GO:1902495	Transmembrane transporter complex	0.000721171	0.00741473	193
CC	GO:0031526	Brush border membrane	0.000724094	0.00741473	42
BP	GO:0035272	Exocrine system development	0.000506037	0.00746979	38
BP	GO:0001738	Morphogenesis of a polarized epithelium	0.000507823	0.00747916	94
BP	GO:0072659	Protein localization to plasma membrane	0.000509579	0.00748805	171
BP	GO:0071496	Cellular response to external stimulus	0.00051434	0.00754094	196
BP	GO:0001837	Epithelial to mesenchymal transition	0.000519462	0.00759889	98
BP	GO:1902895	Positive regulation of pri-miRNA transcription by RNA polymerase II	0.000522607	0.00762771	31
BP	GO:0006401	RNA catabolic process	0.000529026	0.00770287	245
BP	GO:0010810	Regulation of cell-substrate adhesion	0.000530724	0.00770287	135
BP	GO:0022406	Membrane docking	0.000532641	0.00770287	114
BP	GO:0001885	Endothelial cell development	0.000532789	0.00770287	46
BP	GO:0099173	Postsynapse organization	0.000533686	0.00770287	110
BP	GO:0007266	Rho protein signal transduction	0.000542748	0.00781629	91
BP	GO:0043087	Regulation of GTPase activity	0.000550597	0.00791178	281
BP	GO:0051817	Modulation of process of other organism involved in symbiotic interaction	0.000553181	0.00793137	67
BP	GO:0007565	Female pregnancy	0.000561801	0.00803722	123
BP	GO:0030071	Regulation of mitotic metaphase/anaphase transition	0.000569658	0.00811388	41
BP	GO:0060688	Regulation of morphogenesis of a branching structure	0.000569658	0.00811388	41
BP	GO:0000723	Telomere maintenance	0.00057394	0.00815698	103
BP	GO:0001892	Embryonic placenta development	0.00057872	0.00820569	61
BP	GO:0120192	Tight junction assembly	0.000584135	0.00820569	55
BP	GO:0014031	Mesenchymal cell development	0.000584517	0.00820569	58
BP	GO:0008202	Steroid metabolic process	0.000584648	0.00820569	199
BP	GO:0036344	Platelet morphogenesis	0.000584934	0.00820569	19
BP	GO:0048705	Skeletal system morphogenesis	0.000584947	0.00820569	141
BP	GO:0015980	Energy derivation by oxidation of organic compounds	0.000586537	0.00821026	169
BP	GO:0006470	Protein dephosphorylation	0.000588566	0.00822094	194
BP	GO:0090193	Positive regulation of glomerulus development	0.000604269	0.00842216	11
BP	GO:0008156	Negative regulation of DNA replication	0.000607821	0.00843547	27
BP	GO:0009156	Ribonucleoside monophosphate biosynthetic process	0.000607821	0.00843547	27
BP	GO:0006006	Glucose metabolic process	0.000616566	0.00853858	133
BP	GO:0098657	Import into cell	0.00062061	0.0085763	142
BP	GO:0071428	RRNA-containing ribonucleoprotein complex export from nucleus	0.000629058	0.00865621	14
BP	GO:0090192	Regulation of glomerulus development	0.000629058	0.00865621	14
BP	GO:0051052	Regulation of DNA metabolic process	0.000635999	0.00873001	217
BP	GO:0032770	Positive regulation of monooxygenase activity	0.00063711	0.00873001	25
BP	GO:0060512	Prostate gland morphogenesis	0.00064914	0.00887614	23
BP	GO:1901607	Alpha-amino acid biosynthetic process	0.000653031	0.00890166	47
BP	GO:0070268	Cornification	0.0006546	0.00890166	75
BP	GO:0043254	Regulation of protein-containing complex assembly	0.000655118	0.00890166	263
CC	GO:0005778	Peroxisomal membrane	0.000896278	0.0089395	43
CC	GO:0031903	Microbody membrane	0.000896278	0.0089395	43
BP	GO:0051098	Regulation of binding	0.000660452	0.00895539	218
BP	GO:0035567	Non-canonical Wnt signaling pathway	0.000665888	0.00899156	97
BP	GO:1903825	Organic acid transmembrane transport	0.000665888	0.00899156	97
BP	GO:0030168	Platelet activation	0.000672697	0.00906466	101
CC	GO:0018995	Host cellular component	0.000934998	0.0090896	46
CC	GO:0043657	Host cell	0.000934998	0.0090896	46
BP	GO:0060071	Wnt signaling pathway, planar cell polarity pathway	0.000686432	0.00923059	72
BP	GO:0000209	Protein polyubiquitination	0.000688771	0.00924291	203
BP	GO:0048736	Appendage development	0.00072121	0.00963839	114
BP	GO:0060173	Limb development	0.00072121	0.00963839	114
BP	GO:0033048	Negative regulation of mitotic sister chromatid segregation	0.00072422	0.00965875	32
KEGG	hsa05224	Breast cancer	0.00017539	0.00976883	104
KEGG	hsa05220	Chronic myeloid leukemia	0.000199155	0.00976883	58
KEGG	hsa05225	Hepatocellular carcinoma	0.000204736	0.00976883	117
BP	GO:0044242	Cellular lipid catabolic process	0.00073677	0.00980598	145
BP	GO:0007163	Establishment or maintenance of cell polarity	0.000740777	0.00983915	136
BP	GO:0014020	Primary neural tube formation	0.00074462	0.00984141	66
BP	GO:0050810	Regulation of steroid biosynthetic process	0.00074462	0.00984141	66
BP	GO:1903311	Regulation of mRNA metabolic process	0.000745492	0.00984141	205
MF	GO:0022804	Active transmembrane transporter activity	0.000122177	0.00992073	218
BP	GO:0016051	Carbohydrate biosynthetic process	0.000761692	0.0100244	132
BP	GO:0019318	Hexose metabolic process	0.000762445	0.0100244	155
BP	GO:0072080	Nephron tubule development	0.000769115	0.0100917	63
BP	GO:0006986	Response to unfolded protein	0.000774412	0.0101407	115
BP	GO:0000280	Nuclear division	0.000780295	0.0101972	251
BP	GO:0030509	BMP signaling pathway	0.000788451	0.0102463	99
BP	GO:0006625	Protein targeting to peroxisome	0.000790362	0.0102463	48
BP	GO:0072662	Protein localization to peroxisome	0.000790362	0.0102463	48
BP	GO:0072663	Establishment of protein localization to peroxisome	0.000790362	0.0102463	48
BP	GO:1901657	Glycosyl compound metabolic process	0.000801712	0.0103727	84
BP	GO:2000816	Negative regulation of mitotic sister chromatid separation	0.000804416	0.0103799	30
BP	GO:0006487	Protein N-linked glycosylation	0.000805461	0.0103799	51
BP	GO:0010769	Regulation of cell morphogenesis involved in differentiation	0.000808812	0.0103833	186
BP	GO:0072332	Intrinsic apoptotic signaling pathway by p53 class mediator	0.000808926	0.0103833	54
BP	GO:0051353	Positive regulation of oxidoreductase activity	0.000829264	0.0106234	40
BP	GO:0007584	Response to nutrient	0.000850111	0.0108043	108
BP	GO:0051302	Regulation of cell division	0.000850111	0.0108043	108
BP	GO:0060041	Retina development in camera-type eye	0.000850722	0.0108043	96
BP	GO:1905039	Carboxylic acid transmembrane transport	0.000850722	0.0108043	96
BP	GO:0001736	Establishment of planar polarity	0.000854541	0.0108043	81
BP	GO:0007164	Establishment of tissue polarity	0.000854541	0.0108043	81
BP	GO:0046677	Response to antibiotic	0.000855025	0.0108043	35
BP	GO:0007221	Positive regulation of transcription of Notch receptor target	0.000863011	0.0108629	16
BP	GO:0046112	Nucleobase biosynthetic process	0.000863011	0.0108629	16
BP	GO:0061326	Renal tubule development	0.000878513	0.0110366	64
BP	GO:0019218	Regulation of steroid metabolic process	0.000882912	0.0110382	85
BP	GO:0045841	Negative regulation of mitotic metaphase/anaphase transition	0.000884073	0.0110382	28
BP	GO:2000310	Regulation of NMDA receptor activity	0.000884073	0.0110382	28
BP	GO:0001836	Release of cytochrome c from mitochondria	0.000887133	0.0110382	43
BP	GO:0044784	Metaphase/anaphase transition of cell cycle	0.000887133	0.0110382	43
BP	GO:0071695	Anatomical structure maturation	0.000899834	0.0111748	144
BP	GO:0048524	Positive regulation of viral process	0.000910436	0.0112849	71
CC	GO:0005788	Endoplasmic reticulum lumen	0.00117623	0.0112918	184
CC	GO:0005802	Trans-Golgi network	0.00119278	0.0113093	149
BP	GO:0035773	Insulin secretion involved in cellular response to glucose stimulus	0.000925071	0.0114227	46
BP	GO:0060675	Ureteric bud morphogenesis	0.000925071	0.0114227	46
MF	GO:0003924	GTPase activity	0.000151657	0.0115449	207
BP	GO:0014032	Neural crest cell development	0.000945827	0.0116568	55
BP	GO:0031669	Cellular response to nutrient levels	0.000964084	0.0118593	136
BP	GO:0033046	Negative regulation of sister chromatid segregation	0.000971148	0.0119236	33
BP	GO:0010001	Glial cell differentiation	0.000984852	0.0120691	141
BP	GO:0048704	Embryonic skeletal system morphogenesis	0.000997862	0.0121161	65
BP	GO:1990823	Response to leukemia inhibitory factor	0.000997862	0.0121161	65
BP	GO:1990830	Cellular response to leukemia inhibitory factor	0.000997862	0.0121161	65
BP	GO:0030220	Platelet formation	0.000999877	0.0121161	18
BP	GO:0072111	Cell proliferation involved in kidney development	0.000999877	0.0121161	18
BP	GO:2000738	Positive regulation of stem cell differentiation	0.000999877	0.0121161	18
BP	GO:0016079	Synaptic vesicle exocytosis	0.00100638	0.0121721	79
BP	GO:0048562	Embryonic organ morphogenesis	0.00101395	0.0122409	181
MF	GO:0008266	Poly(U) RNA binding	0.000171145	0.012262	23
BP	GO:0043457	Regulation of cellular respiration	0.00101965	0.0122869	24
BP	GO:0006576	Cellular biogenic amine metabolic process	0.00103242	0.0123948	41
BP	GO:0061178	Regulation of insulin secretion involved in cellular response to glucose stimulus	0.00103242	0.0123948	41
KEGG	hsa04010	MAPK signaling pathway	0.00030123	0.0125763	194
MF	GO:0042277	Peptide binding	0.000187808	0.0125915	196
MF	GO:0001882	Nucleoside binding	0.00019642	0.0125915	243
BP	GO:0031032	Actomyosin structure organization	0.00105434	0.0126346	124
BP	GO:0003148	Outflow tract septum morphogenesis	0.00105759	0.0126502	22
BP	GO:0030111	Regulation of Wnt signaling pathway	0.00109295	0.0130491	221
BP	GO:0048286	Lung alveolus development	0.00109682	0.0130713	31
BP	GO:0042398	Cellular modified amino acid biosynthetic process	0.00110291	0.0131197	36
BP	GO:0071300	Cellular response to retinoic acid	0.00111021	0.0131379	47
BP	GO:0042176	Regulation of protein catabolic process	0.00111209	0.0131379	233
BP	GO:0060411	Cardiac septum morphogenesis	0.00111455	0.0131379	53
BP	GO:0070830	Bicellular tight junction assembly	0.00111455	0.0131379	53
BP	GO:0072028	Nephron morphogenesis	0.00111455	0.0131379	53
BP	GO:0033047	Regulation of mitotic sister chromatid segregation	0.00111988	0.013153	50
BP	GO:0042440	Pigment metabolic process	0.00111988	0.013153	50
CC	GO:0030027	Lamellipodium	0.00140591	0.0131675	124
BP	GO:0048706	Embryonic skeletal system development	0.00113995	0.0133646	84
BP	GO:0019080	Viral gene expression	0.00115131	0.0133767	121
BP	GO:0043393	Regulation of protein binding	0.00115323	0.0133767	130
BP	GO:0007018	Microtubule-based movement	0.00115672	0.0133767	217
BP	GO:0000054	Ribosomal subunit export from nucleus	0.00115746	0.0133767	13
BP	GO:0033750	Ribosome localization	0.00115746	0.0133767	13
BP	GO:0051938	L-glutamate import	0.00115746	0.0133767	13
BP	GO:0072216	Positive regulation of metanephros development	0.00115746	0.0133767	13
BP	GO:1901722	Regulation of cell proliferation involved in kidney development	0.00115746	0.0133767	13
BP	GO:0030203	Glycosaminoglycan metabolic process	0.00116981	0.013416	100
BP	GO:0045926	Negative regulation of growth	0.00117483	0.013416	154
BP	GO:0060993	Kidney morphogenesis	0.00117799	0.013416	63
BP	GO:0031331	Positive regulation of cellular catabolic process	0.00117846	0.013416	229
BP	GO:0006805	Xenobiotic metabolic process	0.00118544	0.013416	77
BP	GO:0006222	UMP biosynthetic process	0.00118565	0.013416	10
BP	GO:0009113	Purine nucleobase biosynthetic process	0.00118565	0.013416	10
BP	GO:0009173	Pyrimidine ribonucleoside monophosphate metabolic process	0.00118565	0.013416	10
BP	GO:0009174	Pyrimidine ribonucleoside monophosphate biosynthetic process	0.00118565	0.013416	10
BP	GO:0014041	Regulation of neuron maturation	0.00118565	0.013416	10
BP	GO:0035999	Tetrahydrofolate interconversion	0.00118565	0.013416	10
BP	GO:0046049	UMP metabolic process	0.00118565	0.013416	10
BP	GO:0001841	Neural tube formation	0.00120241	0.0135349	70
BP	GO:0030038	Contractile actin filament bundle assembly	0.00120241	0.0135349	70
BP	GO:0043149	Stress fiber assembly	0.00120241	0.0135349	70
BP	GO:0050796	Regulation of insulin secretion	0.00120582	0.0135498	113
BP	GO:0030073	Insulin secretion	0.00122093	0.0136723	131
BP	GO:0090276	Regulation of peptide hormone secretion	0.00122093	0.0136723	131
BP	GO:0006084	Acetyl-CoA metabolic process	0.00122995	0.0137496	29
MF	GO:0030674	Protein-macromolecule adaptor activity	0.000227632	0.0138628	158
BP	GO:0017157	Regulation of exocytosis	0.00124604	0.0138987	136
BP	GO:0019751	Polyol metabolic process	0.00124757	0.0138987	85
MF	GO:0032549	Ribonucleoside binding	0.00024198	0.0139797	239
MF	GO:0140097	Catalytic activity, acting on DNA	0.000261559	0.0139797	137
MF	GO:0003713	Transcription coactivator activity	0.00029452	0.0139797	171
MF	GO:0001162	RNA polymerase II intronic transcription regulatory region sequence-specific DNA binding	0.000294908	0.0139797	13
MF	GO:0043539	Protein serine/threonine kinase activator activity	0.000295483	0.0139797	31
MF	GO:0016538	Cyclin-dependent protein serine/threonine kinase regulator activity	0.000298417	0.0139797	39
CC	GO:0043296	Apical junction complex	0.00151164	0.0139872	91
BP	GO:0008652	Cellular amino acid biosynthetic process	0.00126365	0.0140105	57
BP	GO:0033045	Regulation of sister chromatid segregation	0.00126365	0.0140105	57
BP	GO:0043903	Regulation of symbiotic process	0.00126525	0.0140105	141
BP	GO:0051646	Mitochondrion localization	0.00126651	0.0140105	34
BP	GO:0008203	Cholesterol metabolic process	0.00126838	0.0140105	97
BP	GO:0032886	Regulation of microtubule-based process	0.00127899	0.0141036	146
CC	GO:0031594	Neuromuscular junction	0.00154472	0.0141231	52
KEGG	hsa00260	Glycine, serine and threonine metabolism	0.000406805	0.0143617	33
KEGG	hsa03410	Base excision repair	0.000459389	0.0143617	28
KEGG	hsa04014	Ras signaling pathway	0.000472989	0.0143617	157
BP	GO:0032024	Positive regulation of insulin secretion	0.00131364	0.0144367	51
BP	GO:0042273	Ribosomal large subunit biogenesis	0.00131364	0.0144367	51
BP	GO:1903317	Regulation of protein maturation	0.00131779	0.0144579	48
BP	GO:0009266	Response to temperature stimulus	0.00133225	0.0145919	142
BP	GO:0071456	Cellular response to hypoxia	0.00133581	0.0146062	128
CC	GO:0070382	Exocytic vesicle	0.00163178	0.0147436	136
BP	GO:1902652	Secondary alcohol metabolic process	0.00135572	0.014799	102
BP	GO:0050792	Regulation of viral process	0.00136423	0.0148669	133
BP	GO:0110111	Negative regulation of animal organ morphogenesis	0.00136661	0.0148678	27
BP	GO:0044706	Multi-multicellular organism process	0.00138599	0.0150536	138
BP	GO:0048146	Positive regulation of fibroblast proliferation	0.00139249	0.0150989	37
MF	GO:0015399	Primary active transmembrane transporter activity	0.000335219	0.0151221	75
MF	GO:0005525	GTP binding	0.000351092	0.0152725	234
BP	GO:0006885	Regulation of pH	0.00141885	0.0153591	68
CC	GO:0030894	Replisome	0.00172136	0.0153721	21
BP	GO:2001233	Regulation of apoptotic signaling pathway	0.00142447	0.0153942	241
CC	GO:0072686	Mitotic spindle	0.00176606	0.0154427	85
CC	GO:0031968	Organelle outer membrane	0.00178737	0.0154427	133
CC	GO:0034451	Centriolar satellite	0.00178958	0.0154427	63
BP	GO:0140056	Organelle localization by membrane tethering	0.00143214	0.0154514	107
BP	GO:0042752	Regulation of circadian rhythm	0.00143815	0.0154905	79
BP	GO:0035023	Regulation of Rho protein signal transduction	0.00144557	0.0155294	58
BP	GO:1901659	Glycosyl compound biosynthetic process	0.00144893	0.0155294	32
BP	GO:2000648	Positive regulation of stem cell proliferation	0.00144893	0.0155294	32
BP	GO:0031960	Response to corticosteroid	0.00145557	0.0155748	103
BP	GO:0008217	Regulation of blood pressure	0.00146093	0.0156065	116
BP	GO:0046034	ATP metabolic process	0.00147293	0.0157088	185
BP	GO:0010332	Response to gamma radiation	0.00147828	0.0157143	40
BP	GO:0044273	Sulfur compound catabolic process	0.00147828	0.0157143	40
BP	GO:0035107	Appendage morphogenesis	0.00148465	0.0157305	95
BP	GO:0035108	Limb morphogenesis	0.00148465	0.0157305	95
BP	GO:0090175	Regulation of establishment of planar polarity	0.00148803	0.0157407	72
BP	GO:0043405	Regulation of MAP kinase activity	0.00150068	0.0158486	202
BP	GO:0030198	Extracellular matrix organization	0.00150976	0.0159152	231
BP	GO:0009048	Dosage compensation by inactivation of X chromosome	0.00151679	0.0159152	15
BP	GO:0035855	Megakaryocyte development	0.00151679	0.0159152	15
BP	GO:1905331	Negative regulation of morphogenesis of an epithelium	0.00151679	0.0159152	15
KEGG	hsa05231	Choline metabolism in cancer	0.000616961	0.0159333	71
KEGG	hsa04141	Protein processing in endoplasmic reticulum	0.000620158	0.0159333	117
CC	GO:0019867	Outer membrane	0.00188167	0.0160569	134
BP	GO:0072171	Mesonephric tubule morphogenesis	0.00155076	0.0162455	46
CC	GO:0019897	Extrinsic component of plasma membrane	0.00193532	0.0163333	107
BP	GO:0060828	Regulation of canonical Wnt signaling pathway	0.00157447	0.0164673	176
BP	GO:0051092	Positive regulation of NF-kappaB transcription factor activity	0.00158361	0.0165097	100
BP	GO:0055067	Monovalent inorganic cation homeostasis	0.00158361	0.0165097	100
MF	GO:0032550	Purine ribonucleoside binding	0.000395364	0.0165736	236
MF	GO:0004879	Nuclear receptor activity	0.000421824	0.0165736	40
MF	GO:0098531	Ligand-activated transcription factor activity	0.000421824	0.0165736	40
BP	GO:0003231	Cardiac ventricle development	0.00159933	0.0166469	84
KEGG	hsa05218	Melanoma	0.000698418	0.0166623	54
BP	GO:0072329	Monocarboxylic acid catabolic process	0.00160985	0.0167069	88
BP	GO:0016574	Histone ubiquitination	0.00161281	0.0167069	35
BP	GO:0051972	Regulation of telomerase activity	0.00161281	0.0167069	35
BP	GO:0060441	Epithelial tube branching involved in lung morphogenesis	0.0016203	0.0167578	23
BP	GO:0021537	Telencephalon development	0.00162502	0.0167798	156
BP	GO:1901568	Fatty acid derivative metabolic process	0.00163467	0.0168526	109
BP	GO:0006730	One-carbon metabolic process	0.00164984	0.0169553	30
BP	GO:1905819	Negative regulation of chromosome separation	0.00164984	0.0169553	30
BP	GO:0045807	Positive regulation of endocytosis	0.0016748	0.0171845	66
CC	GO:0005834	Heterotrimeric G-protein complex	0.00211198	0.0172553	26
CC	GO:0032839	Dendrite cytoplasm	0.00211198	0.0172553	26
CC	GO:1905360	GTPase complex	0.00211198	0.0172553	26
BP	GO:0002320	Lymphoid progenitor cell differentiation	0.00169784	0.0173345	17
BP	GO:0006144	Purine nucleobase metabolic process	0.00169784	0.0173345	17
BP	GO:0033522	Histone H2A ubiquitination	0.00171077	0.0173345	21
BP	GO:0051654	Establishment of mitochondrion localization	0.00171077	0.0173345	21
BP	GO:0060740	Prostate gland epithelium morphogenesis	0.00171077	0.0173345	21
BP	GO:0072012	Glomerulus vasculature development	0.00171077	0.0173345	21
BP	GO:1900739	Regulation of protein insertion into mitochondrial membrane involved in apoptotic signaling pathway	0.00171077	0.0173345	21
BP	GO:1900740	Positive regulation of protein insertion into mitochondrial membrane involved in apoptotic signaling	0.00171077	0.0173345	21
BP	GO:0000731	DNA synthesis involved in DNA repair	0.00172557	0.0174301	38
BP	GO:0099172	Presynapse organization	0.00172557	0.0174301	38
BP	GO:0006297	Nucleotide-excision repair, DNA gap filling	0.00174783	0.0174917	19
BP	GO:0034643	Establishment of mitochondrion localization, microtubule-mediated	0.00174783	0.0174917	19
BP	GO:0035162	Embryonic hemopoiesis	0.00174783	0.0174917	19
BP	GO:0047497	Mitochondrion transport along microtubule	0.00174783	0.0174917	19
BP	GO:0060479	Lung cell differentiation	0.00174783	0.0174917	19
BP	GO:0072010	Glomerular epithelium development	0.00174783	0.0174917	19
BP	GO:0060395	SMAD protein signal transduction	0.00176246	0.0176111	53
BP	GO:0046128	Purine ribonucleoside metabolic process	0.00179384	0.0178422	41
BP	GO:1902099	Regulation of metaphase/anaphase transition of cell cycle	0.00179384	0.0178422	41
BP	GO:1903749	Positive regulation of establishment of protein localization to mitochondrion	0.00179384	0.0178422	41
BP	GO:0072078	Nephron tubule morphogenesis	0.00180339	0.0178824	50
BP	GO:1903747	Regulation of establishment of protein localization to mitochondrion	0.00180339	0.0178824	50
BP	GO:0043062	Extracellular structure organization	0.00180785	0.0178994	231
BP	GO:0003279	Cardiac septum development	0.00181401	0.017933	74
BP	GO:0032868	Response to insulin	0.00181898	0.0179549	169
CC	GO:0120111	Neuron projection cytoplasm	0.00222111	0.0179559	58
KEGG	hsa05215	Prostate cancer	0.000807564	0.0179818	70
CC	GO:0031253	Cell projection membrane	0.00226068	0.0180583	202
CC	GO:0005769	Early endosome	0.00228667	0.0180583	220
CC	GO:0031461	Cullin-RING ubiquitin ligase complex	0.00230432	0.0180583	101
CC	GO:0016607	Nuclear speck	0.00234583	0.0181409	233
CC	GO:0031519	PcG protein complex	0.00236209	0.0181409	34
BP	GO:0006865	Amino acid transport	0.0018496	0.0182213	98
BP	GO:0006402	MRNA catabolic process	0.00185882	0.0182213	220
BP	GO:0003197	Endocardial cushion development	0.00186356	0.0182213	33
BP	GO:0051985	Negative regulation of chromosome segregation	0.00186356	0.0182213	33
BP	GO:0006296	Nucleotide-excision repair, DNA incision, 5'-to lesion	0.00186738	0.0182213	28
BP	GO:0071542	Dopaminergic neuron differentiation	0.00186738	0.0182213	28
BP	GO:1902100	Negative regulation of metaphase/anaphase transition of cell cycle	0.00186738	0.0182213	28
BP	GO:0016358	Dendrite development	0.00186842	0.0182213	149
MF	GO:0001217	DNA-binding transcription repressor activity	0.000494007	0.0184853	210
MF	GO:0001883	Purine nucleoside binding	0.000520401	0.0184853	237
MF	GO:0019001	Guanyl nucleotide binding	0.000531187	0.0184853	245
MF	GO:0032561	Guanyl ribonucleotide binding	0.000531187	0.0184853	245
CC	GO:0008021	Synaptic vesicle	0.00247571	0.0188252	125
BP	GO:0110110	Positive regulation of animal organ morphogenesis	0.00194226	0.018913	57
BP	GO:0090501	RNA phosphodiester bond hydrolysis	0.00194576	0.0189187	103
MF	GO:0001227	DNA-binding transcription repressor activity, RNA polymerase II-specific	0.000583909	0.0191662	209
MF	GO:0001972	Retinoic acid binding	0.000598766	0.0191662	18
MF	GO:0001221	Transcription cofactor binding	0.000613697	0.0191662	39
MF	GO:0042887	Amide transmembrane transporter activity	0.000613697	0.0191662	39
BP	GO:0043648	Dicarboxylic acid metabolic process	0.00197758	0.0191994	64
BP	GO:0042063	Gliogenesis	0.00198199	0.0192135	182
BP	GO:0061014	Positive regulation of mRNA catabolic process	0.00201198	0.019464	36
BP	GO:0050769	Positive regulation of neurogenesis	0.00201383	0.019464	279
BP	GO:0001659	Temperature homeostasis	0.00202678	0.0195437	108
BP	GO:0030308	Negative regulation of cell growth	0.00202809	0.0195437	117
BP	GO:0070585	Protein localization to mitochondrion	0.00203382	0.0195699	91
BP	GO:0072088	Nephron epithelium morphogenesis	0.00208265	0.0198565	51
BP	GO:0060606	Tube closure	0.0020883	0.0198565	61
BP	GO:2001235	Positive regulation of apoptotic signaling pathway	0.00209348	0.0198565	113
BP	GO:0007094	Mitotic spindle assembly checkpoint	0.00209723	0.0198565	26
BP	GO:0031577	Spindle checkpoint	0.00209723	0.0198565	26
BP	GO:0035633	Maintenance of blood-brain barrier	0.00209723	0.0198565	26
BP	GO:0042558	Pteridine-containing compound metabolic process	0.00209723	0.0198565	26
BP	GO:0043094	Cellular metabolic compound salvage	0.00209723	0.0198565	26
BP	GO:0071173	Spindle assembly checkpoint	0.00209723	0.0198565	26
BP	GO:0071174	Mitotic spindle checkpoint	0.00209723	0.0198565	26
BP	GO:2000036	Regulation of stem cell population maintenance	0.00209723	0.0198565	26
BP	GO:0032781	Positive regulation of ATPase activity	0.00210352	0.0198735	39
BP	GO:0061013	Regulation of mRNA catabolic process	0.00210515	0.0198735	127
BP	GO:0060221	Retinal rod cell differentiation	0.00212018	0.0198997	12
BP	GO:0098712	L-glutamate import across plasma membrane	0.00212018	0.0198997	12
BP	GO:0099640	Axo-dendritic protein transport	0.00212018	0.0198997	12
BP	GO:1990403	Embryonic brain development	0.00212018	0.0198997	12
BP	GO:0008088	Axo-dendritic transport	0.00212963	0.0199308	48
BP	GO:0009880	Embryonic pattern specification	0.00212963	0.0199308	48
BP	GO:0009896	Positive regulation of catabolic process	0.00214014	0.0199845	262
BP	GO:0019985	Translesion synthesis	0.00214689	0.0199845	31
BP	GO:0051784	Negative regulation of nuclear division	0.00214768	0.0199845	42
BP	GO:0061077	Chaperone-mediated protein folding	0.00214768	0.0199845	42
KEGG	hsa04919	Thyroid hormone signaling pathway	0.000957901	0.0199962	85
BP	GO:0042542	Response to hydrogen peroxide	0.00218935	0.0203431	92
BP	GO:0001952	Regulation of cell-matrix adhesion	0.00220692	0.0204479	80
BP	GO:0035270	Endocrine system development	0.00220692	0.0204479	80
CC	GO:0055029	Nuclear DNA-directed RNA polymerase complex	0.00273127	0.0205649	67
BP	GO:0022613	Ribonucleoprotein complex biogenesis	0.0022479	0.0207979	277
MF	GO:0005310	Dicarboxylic acid transmembrane transporter activity	0.000700975	0.0208458	31
MF	GO:0004386	Helicase activity	0.000701705	0.0208458	106
KEGG	hsa04015	Rap1 signaling pathway	0.00107318	0.0210849	140
BP	GO:0051897	Positive regulation of protein kinase B signaling	0.00229007	0.0211579	110
CC	GO:0010494	Cytoplasmic stress granule	0.002853	0.0212729	50
CC	GO:0005849	MRNA cleavage factor complex	0.0028826	0.0212869	18
BP	GO:0006221	Pyrimidine nucleotide biosynthetic process	0.00233123	0.0214163	24
BP	GO:0018196	Peptidyl-asparagine modification	0.00233123	0.0214163	24
BP	GO:0060261	Positive regulation of transcription initiation from RNA polymerase II promoter	0.00233123	0.0214163	24
BP	GO:0071549	Cellular response to dexamethasone stimulus	0.00233123	0.0214163	24
BP	GO:0042445	Hormone metabolic process	0.00234881	0.021517	134
BP	GO:0071241	Cellular response to inorganic substance	0.00234881	0.021517	134
BP	GO:0061337	Cardiac conduction	0.00235213	0.0215171	93
BP	GO:0061333	Renal tubule morphogenesis	0.00238688	0.0218042	52
BP	GO:0030326	Embryonic limb morphogenesis	0.00239762	0.0218409	81
BP	GO:0035113	Embryonic appendage morphogenesis	0.00239762	0.0218409	81
BP	GO:0035966	Response to topologically incorrect protein	0.00243091	0.0221131	125
BP	GO:0001825	Blastocyst formation	0.00246398	0.0223018	29
BP	GO:0007431	Salivary gland development	0.00246398	0.0223018	29
BP	GO:0032506	Cytokinetic process	0.00246398	0.0223018	29
BP	GO:0045839	Negative regulation of mitotic nuclear division	0.00246539	0.0223018	37
BP	GO:0010770	Positive regulation of cell morphogenesis involved in differentiation	0.00247444	0.0223465	98
BP	GO:0071375	Cellular response to peptide hormone stimulus	0.00247721	0.0223465	194
BP	GO:0051091	Positive regulation of DNA-binding transcription factor activity	0.00249874	0.0225094	161
BP	GO:0070613	Regulation of protein processing	0.0025158	0.0226317	46
CC	GO:0005684	U2-type spliceosomal complex	0.0031079	0.0227321	61
MF	GO:0019902	Phosphatase binding	0.000783937	0.0227342	126
BP	GO:0000470	Maturation of LSU-rRNA	0.00255524	0.0229231	22
BP	GO:0006760	Folic acid-containing compound metabolic process	0.00255524	0.0229231	22
BP	GO:1901653	Cellular response to peptide	0.0025661	0.0229887	231
BP	GO:0016042	Lipid catabolic process	0.00257539	0.0230402	201
BP	GO:0000041	Transition metal ion transport	0.00259816	0.0232029	82
BP	GO:0010972	Negative regulation of G2/M transition of mitotic cell cycle	0.00260072	0.0232029	63
BP	GO:0006098	Pentose-phosphate shunt	0.00264871	0.0234378	14
BP	GO:0009129	Pyrimidine nucleoside monophosphate metabolic process	0.00264871	0.0234378	14
BP	GO:0043174	Nucleoside salvage	0.00264871	0.0234378	14
BP	GO:0046134	Pyrimidine nucleoside biosynthetic process	0.00264871	0.0234378	14
BP	GO:0061684	Chaperone-mediated autophagy	0.00264871	0.0234378	14
BP	GO:0072109	Glomerular mesangium development	0.00264871	0.0234378	14
CC	GO:0000922	Spindle pole	0.00323506	0.0234389	102
BP	GO:0008630	Intrinsic apoptotic signaling pathway in response to DNA damage	0.00269762	0.0238382	67
BP	GO:0043462	Regulation of ATPase activity	0.00271644	0.0238745	53
BP	GO:0050000	Chromosome localization	0.00271644	0.0238745	53
BP	GO:0051303	Establishment of chromosome localization	0.00271644	0.0238745	53
BP	GO:0099601	Regulation of neurotransmitter receptor activity	0.00271644	0.0238745	53
BP	GO:0015740	C4-dicarboxylate transport	0.00274611	0.0240258	20
BP	GO:0060571	Morphogenesis of an epithelial fold	0.00274611	0.0240258	20
BP	GO:1905809	Negative regulation of synapse organization	0.00274611	0.0240258	20
BP	GO:0033135	Regulation of peptidyl-serine phosphorylation	0.00274845	0.0240258	91
BP	GO:0001843	Neural tube closure	0.00276033	0.0240972	60
BP	GO:1901605	Alpha-amino acid metabolic process	0.002806	0.0243109	123
BP	GO:0022898	Regulation of transmembrane transporter activity	0.00280843	0.0243109	164
BP	GO:0044106	Cellular amine metabolic process	0.00280864	0.0243109	83
BP	GO:0000460	Maturation of 5.8S rRNA	0.00281421	0.0243109	27
BP	GO:0010092	Specification of animal organ identity	0.00281421	0.0243109	27
BP	GO:0099174	Regulation of presynapse organization	0.00281421	0.0243109	27
BP	GO:0034765	Regulation of ion transmembrane transport	0.00281462	0.0243109	280
BP	GO:0006721	Terpenoid metabolic process	0.00281475	0.0243109	79
KEGG	hsa05226	Gastric cancer	0.00131555	0.0244108	102
BP	GO:0060438	Trachea development	0.00286201	0.0245026	16
BP	GO:2000104	Negative regulation of DNA-dependent DNA replication	0.00286201	0.0245026	16
BP	GO:2000696	Regulation of epithelial cell differentiation involved in kidney development	0.00286201	0.0245026	16
BP	GO:0051000	Positive regulation of nitric-oxide synthase activity	0.00286712	0.0245026	18
BP	GO:0051131	Chaperone-mediated protein complex assembly	0.00286712	0.0245026	18
BP	GO:0051291	Protein heterooligomerization	0.00286712	0.0245026	18
BP	GO:0060487	Lung epithelial cell differentiation	0.00286712	0.0245026	18
BP	GO:0071157	Negative regulation of cell cycle arrest	0.00286712	0.0245026	18
BP	GO:0045445	Myoblast differentiation	0.00291849	0.0249088	57
BP	GO:0007219	Notch signaling pathway	0.00292246	0.0249099	119
BP	GO:0051384	Response to glucocorticoid	0.00294482	0.0250472	92
BP	GO:0050803	Regulation of synapse structure or activity	0.00294628	0.0250472	144
MF	GO:0003707	Steroid hormone receptor activity	0.000910759	0.0252115	22
MF	GO:0030371	Translation repressor activity	0.000910759	0.0252115	22
BP	GO:0006749	Glutathione metabolic process	0.00297389	0.0252489	38
BP	GO:0009308	Amine metabolic process	0.00299382	0.0253518	88
BP	GO:0072655	Establishment of protein localization to mitochondrion	0.00299382	0.0253518	88
CC	GO:0001917	Photoreceptor inner segment	0.00354713	0.0254597	42
CC	GO:0016363	Nuclear matrix	0.00360069	0.0254735	70
CC	GO:0034702	Ion channel complex	0.00361539	0.0254735	176
BP	GO:0030510	Regulation of BMP signaling pathway	0.00307214	0.0259597	61
BP	GO:0030902	Hindbrain development	0.00307722	0.0259597	97
BP	GO:0051216	Cartilage development	0.00307759	0.0259597	120
BP	GO:0006022	Aminoglycan metabolic process	0.00308614	0.025998	106
BP	GO:0006734	NADH metabolic process	0.00315808	0.0264668	30
BP	GO:0021532	Neural tube patterning	0.00315808	0.0264668	30
BP	GO:0046825	Regulation of protein export from nucleus	0.00315808	0.0264668	30
BP	GO:0050434	Positive regulation of viral transcription	0.00315808	0.0264668	30
BP	GO:0045069	Regulation of viral genome replication	0.00318237	0.0266288	65
BP	GO:0019692	Deoxyribose phosphate metabolic process	0.00319382	0.0266288	25
BP	GO:0042339	Keratan sulfate metabolic process	0.00319382	0.0266288	25
BP	GO:0050685	Positive regulation of mRNA processing	0.00319382	0.0266288	25
BP	GO:0009583	Detection of light stimulus	0.00321487	0.02677	51
KEGG	hsa05214	Glioma	0.00155955	0.0269618	55
KEGG	hsa04360	Axon guidance	0.00161448	0.0269618	122
BP	GO:0043406	Positive regulation of MAP kinase activity	0.00325279	0.0270511	157
CC	GO:0000428	DNA-directed RNA polymerase complex	0.00388056	0.0270934	67
BP	GO:0009798	Axis specification	0.00326316	0.0271026	58
BP	GO:0072089	Stem cell proliferation	0.00329204	0.0272509	81
BP	GO:0032970	Regulation of actin filament-based process	0.0032928	0.0272509	234
BP	GO:0009062	Fatty acid catabolic process	0.0032936	0.0272509	73
BP	GO:0120254	Olefinic compound metabolic process	0.00330465	0.0273075	77
MF	GO:0001091	RNA polymerase II general transcription initiation factor binding	0.0010142	0.027451	17
BP	GO:0030177	Positive regulation of Wnt signaling pathway	0.00333181	0.0274776	112
BP	GO:0072330	Monocarboxylic acid biosynthetic process	0.00334147	0.0274776	147
BP	GO:0015800	Acidic amino acid transport	0.00334216	0.0274776	48
BP	GO:0061180	Mammary gland epithelium development	0.00334216	0.0274776	48
BP	GO:0016311	Dephosphorylation	0.00334701	0.0274827	281
KEGG	hsa03430	Mismatch repair	0.00173518	0.0275975	20
MF	GO:0030515	SnoRNA binding	0.0010455	0.0276829	26
BP	GO:0001754	Eye photoreceptor cell differentiation	0.00337915	0.0277116	33
BP	GO:0019216	Regulation of lipid metabolic process	0.00338537	0.0277276	248
BP	GO:0006605	Protein targeting	0.00342034	0.0279787	255
BP	GO:0106106	Cold-induced thermogenesis	0.00343772	0.0280503	90
BP	GO:0120161	Regulation of cold-induced thermogenesis	0.00343772	0.0280503	90
BP	GO:0042278	Purine nucleoside metabolic process	0.00351499	0.0286448	42
BP	GO:0043113	Receptor clustering	0.00353789	0.0287952	39
KEGG	hsa04934	Cushing syndrome	0.00195493	0.0288476	105
KEGG	hsa00480	Glutathione metabolism	0.00198651	0.0288476	43
BP	GO:0007160	Cell-matrix adhesion	0.00354963	0.0288546	138
BP	GO:0033138	Positive regulation of peptidyl-serine phosphorylation	0.00355628	0.0288725	70
BP	GO:0016125	Sterol metabolic process	0.00358104	0.0289605	104
BP	GO:0031123	RNA 3'-end processing	0.00358379	0.0289605	95
BP	GO:0010800	Positive regulation of peptidyl-threonine phosphorylation	0.00359387	0.0289605	23
BP	GO:0018279	Protein N-linked glycosylation via asparagine	0.00359387	0.0289605	23
BP	GO:0030511	Positive regulation of transforming growth factor beta receptor signaling pathway	0.00359387	0.0289605	23
BP	GO:1903846	Positive regulation of cellular response to transforming growth factor beta stimulus	0.00359387	0.0289605	23
KEGG	hsa02010	ABC transporters	0.00209506	0.0291562	35
BP	GO:0042769	DNA damage response, detection of DNA damage	0.00365221	0.0293282	28
BP	GO:2000144	Positive regulation of DNA-templated transcription, initiation	0.00365221	0.0293282	28
BP	GO:0019083	Viral transcription	0.00365304	0.0293282	109
BP	GO:0045333	Cellular respiration	0.00370333	0.0296919	114
BP	GO:0007059	Chromosome segregation	0.00370749	0.0296919	195
CC	GO:0005875	Microtubule associated complex	0.00436297	0.0298721	98
CC	GO:0043601	Nuclear replisome	0.00439525	0.0298721	19
CC	GO:0098533	ATPase dependent transmembrane transport complex	0.00439525	0.0298721	19
BP	GO:0098659	Inorganic cation import across plasma membrane	0.00375537	0.0299731	63
BP	GO:0099587	Inorganic ion import across plasma membrane	0.00375537	0.0299731	63
BP	GO:0045666	Positive regulation of neuron differentiation	0.00375645	0.0299731	220
BP	GO:1901292	Nucleoside phosphate catabolic process	0.0038068	0.0303005	49
BP	GO:1902036	Regulation of hematopoietic stem cell differentiation	0.0038068	0.0303005	49
BP	GO:0008637	Apoptotic mitochondrial changes	0.00385862	0.0304923	79
BP	GO:0043297	Apical junction assembly	0.00385931	0.0304923	56
BP	GO:0009071	Serine family amino acid catabolic process	0.00386376	0.0304923	11
BP	GO:0016188	Synaptic vesicle maturation	0.00386376	0.0304923	11
BP	GO:0042340	Keratan sulfate catabolic process	0.00386376	0.0304923	11
BP	GO:0060742	Epithelial cell differentiation involved in prostate gland development	0.00386376	0.0304923	11
BP	GO:1904816	Positive regulation of protein localization to chromosome, telomeric region	0.00386376	0.0304923	11
CC	GO:0030139	Endocytic vesicle	0.00453444	0.0305301	183
CC	GO:0005779	Integral component of peroxisomal membrane	0.00461132	0.0305301	13
CC	GO:0031231	Intrinsic component of peroxisomal membrane	0.00461132	0.0305301	13
KEGG	hsa04146	Peroxisome	0.00228553	0.0305347	59
BP	GO:0043547	Positive regulation of GTPase activity	0.00388009	0.030584	234
CC	GO:0032806	Carboxy-terminal domain protein kinase complex	0.00468758	0.0307698	17
BP	GO:0046661	Male sex differentiation	0.0039233	0.0308871	101
CC	GO:0005847	MRNA cleavage and polyadenylation specificity factor complex	0.00480773	0.031028	15
CC	GO:0090533	Cation-transporting ATPase complex	0.00480773	0.031028	15
KEGG	hsa03018	RNA degradation	0.00242894	0.0312025	57
KEGG	hsa01522	Endocrine resistance	0.00254989	0.0314248	69
KEGG	hsa04724	Glutamatergic synapse	0.00263441	0.0314248	79
BP	GO:0072337	Modified amino acid transport	0.00399688	0.0314283	21
BP	GO:0060560	Developmental growth involved in morphogenesis	0.00402617	0.0316203	141
BP	GO:0006520	Cellular amino acid metabolic process	0.0040538	0.0317988	198
BP	GO:2001252	Positive regulation of chromosome organization	0.00406307	0.0318331	111
BP	GO:0048872	Homeostasis of number of cells	0.00406909	0.0318419	152
CC	GO:0005604	Basement membrane	0.00498741	0.0319194	66
BP	GO:0071805	Potassium ion transmembrane transport	0.00409662	0.0320187	131
BP	GO:0042461	Photoreceptor cell development	0.00411527	0.0320873	34
BP	GO:0055010	Ventricular cardiac muscle tissue morphogenesis	0.00411527	0.0320873	34
BP	GO:0035264	Multicellular organism growth	0.00417284	0.0323822	93
BP	GO:0090263	Positive regulation of canonical Wnt signaling pathway	0.00417284	0.0323822	93
BP	GO:0032210	Regulation of telomere maintenance via telomerase	0.00417623	0.0323822	37
BP	GO:0006739	NADP metabolic process	0.00420794	0.0323822	26
BP	GO:0009262	Deoxyribonucleotide metabolic process	0.00420794	0.0323822	26
BP	GO:0010259	Multicellular organism aging	0.00420794	0.0323822	26
BP	GO:0030513	Positive regulation of BMP signaling pathway	0.00420794	0.0323822	26
BP	GO:0046471	Phosphatidylglycerol metabolic process	0.00420794	0.0323822	26
BP	GO:1901030	Positive regulation of mitochondrial outer membrane permeabilization involved in apoptotic signaling	0.00420794	0.0323822	26
BP	GO:1904031	Positive regulation of cyclin-dependent protein kinase activity	0.00420794	0.0323822	26
BP	GO:1905606	Regulation of presynapse assembly	0.00420794	0.0323822	26
BP	GO:0018212	Peptidyl-tyrosine modification	0.0042137	0.0323881	218
KEGG	hsa03420	Nucleotide excision repair	0.00291933	0.0327344	36
KEGG	hsa05219	Bladder cancer	0.00294021	0.0327344	32
BP	GO:0030512	Negative regulation of transforming growth factor beta receptor signaling pathway	0.00429198	0.0328627	57
BP	GO:0051262	Protein tetramerization	0.00429198	0.0328627	57
BP	GO:0055072	Iron ion homeostasis	0.00429198	0.0328627	57
BP	GO:0006695	Cholesterol biosynthetic process	0.0043058	0.0328627	50
BP	GO:1901983	Regulation of protein acetylation	0.0043058	0.0328627	50
BP	GO:1902653	Secondary alcohol biosynthetic process	0.0043058	0.0328627	50
BP	GO:0060444	Branching involved in mammary gland duct morphogenesis	0.00437152	0.0333252	19
CC	GO:0005741	Mitochondrial outer membrane	0.00528638	0.0335532	116
BP	GO:0030641	Regulation of cellular pH	0.00443299	0.0337146	61
BP	GO:0034308	Primary alcohol metabolic process	0.00443299	0.0337146	61
BP	GO:0050770	Regulation of axonogenesis	0.00449899	0.0341765	113
BP	GO:0006879	Cellular iron ion homeostasis	0.00451036	0.0342229	47
BP	GO:0010811	Positive regulation of cell-substrate adhesion	0.00452269	0.0342764	77
BP	GO:0006813	Potassium ion transport	0.00453904	0.0343602	144
BP	GO:0000463	Maturation of LSU-rRNA from tricistronic rRNA transcript (SSU-rRNA, 5.8S rRNA, LSU-rRNA)	0.00459205	0.0344802	13
BP	GO:0001829	Trophectodermal cell differentiation	0.00459205	0.0344802	13
BP	GO:0009130	Pyrimidine nucleoside monophosphate biosynthetic process	0.00459205	0.0344802	13
BP	GO:0051290	Protein heterotetramerization	0.00459205	0.0344802	13
BP	GO:0060391	Positive regulation of SMAD protein signal transduction	0.00459205	0.0344802	13
BP	GO:1901550	Regulation of endothelial cell development	0.00459205	0.0344802	13
BP	GO:1903140	Regulation of establishment of endothelial barrier	0.00459205	0.0344802	13
BP	GO:0009069	Serine family amino acid metabolic process	0.00461034	0.0345775	29
MF	GO:0003725	Double-stranded RNA binding	0.00133534	0.0346053	54
BP	GO:0042276	Error-prone translesion synthesis	0.00466417	0.0349007	17
BP	GO:0060216	Definitive hemopoiesis	0.00466417	0.0349007	17
BP	GO:0055076	Transition metal ion homeostasis	0.00468273	0.034959	86
BP	GO:0098754	Detoxification	0.00468273	0.034959	86
BP	GO:0045604	Regulation of epidermal cell differentiation	0.0046901	0.034972	44
BP	GO:0048469	Cell maturation	0.00469524	0.034972	109
BP	GO:0061351	Neural precursor cell proliferation	0.0047094	0.0350373	95
BP	GO:0018108	Peptidyl-tyrosine phosphorylation	0.00472362	0.0350393	216
BP	GO:0006888	Endoplasmic reticulum to Golgi vesicle-mediated transport	0.00472586	0.0350393	124
BP	GO:0042594	Response to starvation	0.00472586	0.0350393	124
BP	GO:0048839	Inner ear development	0.00473596	0.0350618	119
BP	GO:0022404	Molting cycle process	0.00475048	0.0350618	58
BP	GO:0022405	Hair cycle process	0.00475048	0.0350618	58
BP	GO:1903845	Negative regulation of cellular response to transforming growth factor beta stimulus	0.00475048	0.0350618	58
BP	GO:0006766	Vitamin metabolic process	0.00478403	0.0351617	82
BP	GO:0006349	Regulation of gene expression by genetic imprinting	0.00478567	0.0351617	15
BP	GO:0006883	Cellular sodium ion homeostasis	0.00478567	0.0351617	15
BP	GO:0032048	Cardiolipin metabolic process	0.00478567	0.0351617	15
KEGG	hsa04152	AMPK signaling pathway	0.00327424	0.0352773	83
BP	GO:0009267	Cellular response to starvation	0.00481708	0.0353525	100
BP	GO:0021591	Ventricular system development	0.00482423	0.035365	24
BP	GO:0042771	Intrinsic apoptotic signaling pathway in response to DNA damage by p53 class mediator	0.00483862	0.0354305	32
BP	GO:2001020	Regulation of response to DNA damage stimulus	0.00485386	0.0355021	135
BP	GO:0051101	Regulation of DNA binding	0.00486508	0.0355441	78
BP	GO:0001954	Positive regulation of cell-matrix adhesion	0.00491942	0.0358617	38
BP	GO:0035335	Peptidyl-tyrosine dephosphorylation	0.00492986	0.0358617	66
BP	GO:0007528	Neuromuscular junction development	0.00493064	0.0358617	35
BP	GO:0099054	Presynapse assembly	0.00493064	0.0358617	35
BP	GO:0048864	Stem cell development	0.00507635	0.0368802	55
BP	GO:0090101	Negative regulation of transmembrane receptor protein serine/threonine kinase signaling pathway	0.00511771	0.0371391	83
CC	GO:0098984	Neuron to neuron synapse	0.00606151	0.0381577	212
BP	GO:0030879	Mammary gland development	0.00531845	0.0385099	88
BP	GO:0046546	Development of primary male sexual characteristics	0.00531845	0.0385099	88
BP	GO:0032956	Regulation of actin cytoskeleton organization	0.00534683	0.0386722	208
BP	GO:0060260	Regulation of transcription initiation from RNA polymerase II promoter	0.00537062	0.0388011	27
BP	GO:0006446	Regulation of translational initiation	0.00540617	0.038928	52
BP	GO:0006826	Iron ion transport	0.00540617	0.038928	52
BP	GO:0007492	Endoderm development	0.00540617	0.038928	52
KEGG	hsa04726	Serotonergic synapse	0.0038234	0.0390612	79
KEGG	hsa00983	Drug metabolism - other enzymes	0.00385934	0.0390612	57
BP	GO:0003158	Endothelium development	0.00546396	0.0392299	84
BP	GO:0009799	Specification of symmetry	0.00546396	0.0392299	84
BP	GO:0019882	Antigen processing and presentation	0.00547138	0.0392299	138
BP	GO:2001056	Positive regulation of cysteine-type endopeptidase activity	0.00547226	0.0392299	93
BP	GO:0006294	Nucleotide-excision repair, preincision complex assembly	0.00549362	0.0392963	22
BP	GO:0042634	Regulation of hair cycle	0.00549362	0.0392963	22
MF	GO:0019903	Protein phosphatase binding	0.00156581	0.0397325	98
BP	GO:1902475	L-alpha-amino acid transmembrane transport	0.00556122	0.0397361	42
BP	GO:0050921	Positive regulation of chemotaxis	0.0056533	0.0403496	89
CC	GO:0017053	Transcription repressor complex	0.00646528	0.0403686	50
MF	GO:0031406	Carboxylic acid binding	0.00167844	0.0408163	135
MF	GO:0008301	DNA binding, bending	0.00170905	0.0408163	16
MF	GO:0098918	Structural constituent of synapse	0.00170905	0.0408163	16
MF	GO:0003712	Transcription coregulator activity	0.00174541	0.0408829	299
BP	GO:0032412	Regulation of ion transmembrane transporter activity	0.0057417	0.0409356	156
BP	GO:0016101	Diterpenoid metabolic process	0.00577288	0.0410998	72
BP	GO:0045665	Negative regulation of neuron differentiation	0.00577739	0.0410998	134
BP	GO:0000082	G1/S transition of mitotic cell cycle	0.00581633	0.0412948	168
BP	GO:0046580	Negative regulation of Ras protein signal transduction	0.00582387	0.0412948	36
BP	GO:1990089	Response to nerve growth factor	0.00582387	0.0412948	36
BP	GO:0016569	Covalent chromatin modification	0.00586908	0.04157	273
BP	GO:0016570	Histone modification	0.00588348	0.0416266	266
CC	GO:0030672	Synaptic vesicle membrane	0.00690984	0.0418128	66
CC	GO:0099501	Exocytic vesicle membrane	0.00690984	0.0418128	66
CC	GO:0032279	Asymmetric synapse	0.0069361	0.0418128	198
CC	GO:0005652	Nuclear lamina	0.00702324	0.0418128	10
CC	GO:0005885	Arp2/3 protein complex	0.00702324	0.0418128	10
CC	GO:0031010	ISWI-type complex	0.00702324	0.0418128	10
BP	GO:0034620	Cellular response to unfolded protein	0.00599942	0.0423618	90
BP	GO:0010833	Telomere maintenance via telomere lengthening	0.00600697	0.0423618	53
BP	GO:0016126	Sterol biosynthetic process	0.00600697	0.0423618	53
BP	GO:0006513	Protein monoubiquitination	0.00605025	0.0425746	46
BP	GO:0007004	Telomere maintenance via telomerase	0.00605025	0.0425746	46
BP	GO:0045862	Positive regulation of proteolysis	0.00607442	0.0426984	213
BP	GO:0048675	Axon extension	0.00610845	0.0428912	77
BP	GO:1990845	Adaptive thermogenesis	0.00612783	0.0429809	95
CC	GO:0031252	Cell leading edge	0.0072799	0.0430074	240
BP	GO:0014068	Positive regulation of phosphatidylinositol 3-kinase signaling	0.00618369	0.0433258	57
BP	GO:0070633	Transepithelial transport	0.00619727	0.0433485	20
BP	GO:0030518	Intracellular steroid hormone receptor signaling pathway	0.00621317	0.0433485	73
BP	GO:0046916	Cellular transition metal ion homeostasis	0.00621317	0.0433485	73
BP	GO:0046165	Alcohol biosynthetic process	0.00621362	0.0433485	100
BP	GO:1901888	Regulation of cell junction assembly	0.00622938	0.0434119	120
BP	GO:0042908	Xenobiotic transport	0.00623989	0.0434385	25
BP	GO:0021510	Spinal cord development	0.00628281	0.0436437	69
BP	GO:0043618	Regulation of transcription from RNA polymerase II promoter in response to stress	0.00628281	0.0436437	69
BP	GO:0009584	Detection of visible light	0.00634397	0.0439745	43
BP	GO:0060135	Maternal process involved in female pregnancy	0.00634397	0.0439745	43
CC	GO:0001650	Fibrillar center	0.00752831	0.0441354	80
KEGG	hsa05207	Chemical carcinogenesis - receptor activation	0.00458586	0.0444713	138
KEGG	hsa05166	Human T-cell leukemia virus 1 infection	0.00466017	0.0444713	144
BP	GO:0050679	Positive regulation of epithelial cell proliferation	0.00643264	0.0445416	126
BP	GO:0051017	Actin filament bundle assembly	0.00647088	0.0447586	96
MF	GO:0016765	Transferase activity, transferring alkyl or aryl (other than methyl) groups	0.00199131	0.0451945	41
MF	GO:0051082	Unfolded protein binding	0.00204657	0.0451945	79
MF	GO:0001222	Transcription corepressor binding	0.00207791	0.0451945	13
MF	GO:0070411	I-SMAD binding	0.00207791	0.0451945	13
BP	GO:2001242	Regulation of intrinsic apoptotic signaling pathway	0.00654223	0.045204	101
BP	GO:0008584	Male gonad development	0.00657766	0.0454005	87
BP	GO:0046605	Regulation of centrosome cycle	0.00659879	0.0454498	40
BP	GO:0051058	Negative regulation of small GTPase mediated signal transduction	0.00659879	0.0454498	40
BP	GO:0006661	Phosphatidylinositol biosynthetic process	0.00667073	0.0457446	74
BP	GO:0008543	Fibroblast growth factor receptor signaling pathway	0.00667073	0.0457446	74
BP	GO:0045785	Positive regulation of cell adhesion	0.00667378	0.0457446	244
BP	GO:0033683	Nucleotide-excision repair, DNA incision	0.00667681	0.0457446	28
BP	GO:1901068	Guanosine-containing compound metabolic process	0.00667681	0.0457446	28
MF	GO:0003777	Microtubule motor activity	0.00215435	0.0460351	54
BP	GO:0098773	Skin epidermis development	0.00678057	0.0463481	58
BP	GO:0009855	Determination of bilateral symmetry	0.0067863	0.0463481	83
BP	GO:0043280	Positive regulation of cysteine-type endopeptidase activity involved in apoptotic process	0.0067863	0.0463481	83
BP	GO:0045684	Positive regulation of epidermis development	0.00687568	0.0466696	31
BP	GO:0090503	RNA phosphodiester bond hydrolysis, exonucleolytic	0.00687568	0.0466696	31
BP	GO:0006063	Uronic acid metabolic process	0.00689658	0.0466696	18
BP	GO:0019585	Glucuronate metabolic process	0.00689658	0.0466696	18
BP	GO:0002067	Glandular epithelial cell differentiation	0.00689804	0.0466696	34
BP	GO:0010171	Body morphogenesis	0.00689804	0.0466696	34
BP	GO:0032527	Protein exit from endoplasmic reticulum	0.00689804	0.0466696	34
BP	GO:0090151	Establishment of protein localization to mitochondrial membrane	0.00689804	0.0466696	34
BP	GO:0090199	Regulation of release of cytochrome c from mitochondria	0.00689804	0.0466696	34
BP	GO:0019079	Viral genome replication	0.00697762	0.046675	79
BP	GO:0002328	Pro-B cell differentiation	0.00699946	0.046675	10
BP	GO:0008655	Pyrimidine-containing compound salvage	0.00699946	0.046675	10
BP	GO:0042789	MRNA transcription by RNA polymerase II	0.00699946	0.046675	10
BP	GO:0043097	Pyrimidine nucleoside salvage	0.00699946	0.046675	10
BP	GO:0060439	Trachea morphogenesis	0.00699946	0.046675	10
BP	GO:0060525	Prostate glandular acinus development	0.00699946	0.046675	10
BP	GO:0060767	Epithelial cell proliferation involved in prostate gland development	0.00699946	0.046675	10
BP	GO:0070142	Synaptic vesicle budding	0.00699946	0.046675	10
BP	GO:0070203	Regulation of establishment of protein localization to telomere	0.00699946	0.046675	10
BP	GO:0070778	L-aspartate transmembrane transport	0.00699946	0.046675	10
BP	GO:0072110	Glomerular mesangial cell proliferation	0.00699946	0.046675	10
BP	GO:1904869	Regulation of protein localization to Cajal body	0.00699946	0.046675	10
BP	GO:1904871	Positive regulation of protein localization to Cajal body	0.00699946	0.046675	10
CC	GO:0030880	RNA polymerase complex	0.00803603	0.0467551	68
BP	GO:0051346	Negative regulation of hydrolase activity	0.00705294	0.0469834	268
CC	GO:0016592	Mediator complex	0.00817456	0.0472035	29
KEGG	hsa04728	Dopaminergic synapse	0.00511292	0.0474365	89
BP	GO:0046365	Monosaccharide catabolic process	0.0071792	0.0477266	44
BP	GO:1901016	Regulation of potassium ion transmembrane transporter activity	0.0071792	0.0477266	44
MF	GO:0030295	Protein kinase activator activity	0.00227675	0.0478118	57
BP	GO:0009394	2'-deoxyribonucleotide metabolic process	0.00722398	0.0478482	23
BP	GO:0045737	Positive regulation of cyclin-dependent protein serine/threonine kinase activity	0.00722398	0.0478482	23
BP	GO:0098868	Bone growth	0.00722398	0.0478482	23
BP	GO:0034614	Cellular response to reactive oxygen species	0.00722695	0.0478482	103
BP	GO:0035821	Modulation of process of other organism	0.00728216	0.0481646	71
BP	GO:0006767	Water-soluble vitamin metabolic process	0.00730761	0.0481857	55
BP	GO:0034502	Protein localization to chromosome	0.00730761	0.0481857	55
BP	GO:0072384	Organelle transport along microtubule	0.00730761	0.0481857	55
BP	GO:0001503	Ossification	0.00740725	0.0487932	235
BP	GO:0010717	Regulation of epithelial to mesenchymal transition	0.00742433	0.0488067	63
BP	GO:0090277	Positive regulation of peptide hormone secretion	0.00742433	0.0488067	63
BP	GO:0034101	Erythrocyte homeostasis	0.00743505	0.0488278	80
BP	GO:0008356	Asymmetric cell division	0.0075187	0.0491287	16
BP	GO:0032332	Positive regulation of chondrocyte differentiation	0.0075187	0.0491287	16
BP	GO:0046655	Folic acid metabolic process	0.0075187	0.0491287	16
BP	GO:0060231	Mesenchymal to epithelial transition	0.0075187	0.0491287	16
BP	GO:0072311	Glomerular epithelial cell differentiation	0.0075187	0.0491287	16
BP	GO:2000756	Regulation of peptidyl-lysine acetylation	0.00753204	0.0491664	41
BP	GO:0010876	Lipid localization	0.00756073	0.0492966	250
BP	GO:0050714	Positive regulation of protein secretion	0.00758296	0.0492966	104
BP	GO:1990138	Neuron projection extension	0.00758296	0.0492966	104
BP	GO:0006283	Transcription-coupled nucleotide-excision repair	0.00758993	0.0492966	48
BP	GO:0015807	L-amino acid transport	0.00758993	0.0492966	48
BP	GO:0016050	Vesicle organization	0.00760687	0.0493572	196
BP	GO:0097237	Cellular response to toxic substance	0.00763706	0.0494209	76
BP	GO:0034976	Response to endoplasmic reticulum stress	0.0076395	0.0494209	171
BP	GO:0044262	Cellular carbohydrate metabolic process	0.0076395	0.0494209	171
KEGG	hsa04926	Relaxin signaling pathway	0.00553856	0.0494721	87
KEGG	hsa05222	Small cell lung cancer	0.00562856	0.0494721	64
KEGG	hsa04810	Regulation of actin cytoskeleton	0.00591304	0.0495608	141
KEGG	hsa03015	MRNA surveillance pathway	0.00608381	0.0495608	67
KEGG	hsa04713	Circadian entrainment	0.00608381	0.0495608	67
CC	GO:0014069	Postsynaptic density	0.00869692	0.049845	194
GO, Gene Ontology; KEGG, Kyoto Encyclopedia of Genes and Genomes; FDR, false discovery rate.
